# Supplementary material for: Redox Gene Regulator Rex Diverts FermentationIn Concert with Low Charge Export in Streptococcus mutans
Source: Research Square preprint supplement (doi:10.21203/rs.3.rs-2071905/v1), 2022-09-27
Supplement: Supplementary file 1 [file a95e020b72292cc4e4f9ca08.xlsx]

## Sheet: Sheet1
Supplementary Table. 3 | List of differentially expressed genes associated with metabolism in electrode attached S. mutans under SA vs OCV conditions with fold change 1.5.
Gene_ID	Protein_ID	Product	BiGG ID of annotated reactions in the model	Fold change of SA/OCV
Upregulated
SMU_125	WP_002263481.1	NAD(P)H-dependent oxidoreductase	FMNRx	20.3137
SMU_14	WP_002262637.1	hypoxanthine phosphoribosyltransferase	GUAPRT,HXPRT	8.38008
SMU_232	WP_002262761.1	acetolactate synthase small subunit	ACHBS,ACLS	3.93414
SMU_568	WP_002263565.1	amino acid ABC transporter ATP-binding protein	GLUabc	3.60889
SMU_1443c	WP_002263101.1	esterase family protein	SFGTHi	3.54557
SMU_714	WP_002263314.1	elongation factor Tu	SADT2	3.26654
SMU_1089	WP_002262251.1	NAD(P)H-dependent oxidoreductase	FLDO	3.24392
SMU_879	WP_002262873.1	sugar ABC transporter permease	MALTabc	3.04
SMU_1837	WP_002310594.1	3-deoxy-7-phosphoheptulonate synthase	DDPA	2.95812
SMU_871	WP_002262019.1	1-phosphofructokinase	FRUK	2.92565
SMU_872	WP_002262020.1	PTS transporter subunit EIIA	FRUpts	2.89159
SMU_989	WP_002263802.1	aspartate-semialdehyde dehydrogenase	ASAD	2.88475
SMU_962	WP_002262827.1	acyl-CoA/acyl-ACP dehydrogenase	ACOAD1	2.82244
SMU_968	WP_002262832.1	GTP cyclohydrolase I FolE	GTPCI	2.75783
SMU_1743	WP_002262533.1	acyl carrier protein	MCOATA,ACOATA	2.74595
SMU_1046c	WP_002262292.1	GTP pyrophosphokinase family protein	GTPDPK	2.72153
SMU_1741	WP_002262535.1	ACP S-malonyltransferase	KAS12,KAS13,KAS17,KAS4,MCOATA,KAS3,KAS7,KAS1,KAS2,KAS8,KAS11,KAS6	2.69533
SMU_1570	WP_002262978.1	sugar ABC transporter permease	MALTabc,GLYC3Pabc	2.65809
SMU_990	WP_002262854.1	4-hydroxy-tetrahydrodipicolinate synthase	DHDPS	2.63139
SMU_351	WP_002264900.1	ribosome small subunit-dependent GTPase A	NTP3,NTP10,NTP5,NTP1	2.55384
SMU_715	WP_002263313.1	triose-phosphate isomerase	TPI	2.53187
SMU_1466	WP_002263079.1	homoserine O-succinyltransferase	HSST,HSERTA	2.52557
SMU_1491	WP_002263057.1	PTS transporter subunit EIIC	LACpts	2.51501
SMU_1602	WP_002262787.1	NAD(P)H-dependent oxidoreductase	FLVRx	2.50963
SMU_360	WP_002262489.1	type I glyceraldehyde-3-phosphate dehydrogenase	GAPD	2.47502
SMU_947	WP_002262814.1	dihydrofolate reductase	DHFOR2,DHFR	2.39805
SMU_1665	WP_002262679.1	ABC transporter ATP-binding protein	ILEabc,ALAabc,VALabc,THRabc,LEUabc	2.36312
SMU_1019	WP_002263227.1	citrate lyase acyl carrier protein	CITL	2.29536
SMU_676	WP_002262986.1	NADP-dependent glyceraldehyde-3-phosphate dehydrogenase	ALDD2x,SSALx,SSCOARy,VNDH_2,BZDH	2.26698
SMU_675	WP_002262985.1	phosphoenolpyruvate--protein phosphotransferase	TREpts,CELBpts,FRUpts,ACGApts,MALTpts,SUCpts,GLCpts,MNLpts,MANpts,GAMpts	2.18782
SMU_1611c	WP_002262779.1	multidrug efflux MFS transporter	SPMDt3	2.18386
SMU_402	WP_002262619.1	formate C-acetyltransferase	OBTFL,PFL	2.16318
SMU_671	WP_002261870.1	citrate synthase	CS	2.09773
SMU_1492	WP_002263056.1	PTS lactose/cellobiose transporter subunit IIA	LACpts	2.09773
SMU_1938c	WP_002262134.1	ABC transporter permease	METabc,METSabc	2.09457
SMU_1126	WP_002262217.1	type I pantothenate kinase	PNTK	2.07131
SMU_944	WP_002263663.1	thymidylate synthase	TMDS	2.05913
SMU_15	WP_002310748.1	ATP-dependent metallopeptidase FtsH/Yme1/Tma family protein	NTP1	2.03284
SMU_1785	WP_002263519.1	phosphatidate cytidylyltransferase	DASYN_SA	2.02506
SMU_1994	WP_002263428.1	metal ABC transporter ATP-binding protein	ZNabc	2.01914
SMU_971	WP_002262835.1	2-amino-4-hydroxy-6-hydroxymethyldihydropteridine diphosphokinase	HPPK,HPPK2	2.01125
SMU_1571	WP_002262979.1	sn-glycerol-3-phosphate ABC transporter ATP-binding protein UgpC	MALTabc,GLYC3Pabc	2.00526
SMU_858	WP_002262007.1	aspartate carbamoyltransferase catalytic subunit	ASPCT	2.00386
SMU_426	WP_002263707.1	copper-translocating P-type ATPase	Cut1	1.99314
SMU_1625	WP_002263605.1	UMP kinase	UMPK,URIDK2r	1.96746
SMU_1247	WP_002263196.1	phosphopyruvate hydratase	ENO	1.96417
SMU_728	WP_002269214.1	NADP-dependent oxidoreductase	ALCD2ir	1.95124
SMU_1062	WP_002262278.1	ABC transporter permease/substrate binding protein	PROabc,GLYBabc	1.94389
SMU_231	WP_002262762.1	acetolactate synthase large subunit	ACHBS,ACLS	1.94295
SMU_361	WP_002279636.1	phosphoglycerate kinase	PGK	1.92607
SMU_1473c	WP_002263858.1	SDR family oxidoreductase	LSERDHr,ATHRDHr	1.90973
SMU_951	WP_002262818.1	amino acid permease	HISt2r	1.90112
SMU_1740	WP_002262536.1	3-oxoacyl-[acyl-carrier-protein] reductase	KAS7,3OAR60,KAS3,3OAR161,3OAR120,KAS1,KAS8,KAS11,KAS6,3OAR121,3OAR160,KAS12,3OAR80,KAS4,3OAR141,KAS13,KAS17,3OAR180,3OAR40,3OAR181,KAS2,3OAR140,3OAR100	1.89813
SMU_1734	WP_002262542.1	acetyl-CoA carboxylase carboxyl transferase subunit alpha	ACCOAC	1.87182
SMU_1490	WP_002263058.1	6-phospho-beta-galactosidase	6PGALSZ	1.87012
SMU_1674	WP_002352351.1	pyridoxal phosphate-dependent aminotransferase	CYSTL	1.84796
SMU_1096	WP_002262244.1	ABC transporter ATP-binding protein	PROabc,CRNabc,CHLabc,GLYBabc	1.82742
SMU_1077	WP_002262263.1	phospho-sugar mutase	PMANM	1.8209
SMU_82	WP_002263417.1	molecular chaperone DnaK	NTP1	1.79379
SMU_1799	WP_002263507.1	nicotinate-nucleotide adenylyltransferase	NNATr,NMNAT	1.79008
SMU_1051	WP_002262288.1	cysteine desulfurase	I2FE2SR,AMPTASECG,I4FE4SR,I2FE2SS2,ICYSDS,I4FE4ST,I2FE2ST,CYSDSF	1.76301
SMU_1736	WP_002271042.1	acetyl-CoA carboxylase biotin carboxylase subunit	ACCOAC	1.75888
SMU_723	WP_002352235.1	cation-translocating P-type ATPase	MG2uabc,CA2abc1,CA2abc	1.7427
SMU_1739	WP_002269672.1	beta-ketoacyl-ACP synthase II	KAS7,KAS3,KAS1,KAS8,3OAS161,KAS11,3OAS140,3OAS141,KAS12,KAS4,KAS13,KAS17,KAS14,3OAS80,3OAS121,3OAS100,3OAS160,3OAS181,3OAS120,3OAS180,3OAS60,KAS2,KAS6	1.73959
SMU_1022	WP_002263224.1	citrate lyase holo-[acyl-carrier protein] synthase	CITL	1.73262
SMU_1688	WP_002262585.1	D-alanyl-lipoteichoic acid biosynthesis protein DltD	LIPO3S24_BS,TECA2S45	1.71986
SMU_952	WP_002262819.1	homocysteine S-methyltransferase	HCYSMT	1.70821
SMU_2117	WP_002262423.1	ABC transporter permease	CHLabc,PROabc,CHOLSabc_1,GBBTNabc,CRNabc,GLYBabc	1.70583
SMU_1839	WP_002262655.1	mannose-6-phosphate isomerase, class I	MAN6PI	1.6922
SMU_878	WP_002262872.1	extracellular solute-binding protein	MALTabc	1.68908
SMU_460	WP_002262093.1	amino acid ABC transporter permease	METabc,METSabc	1.68812
SMU_1225	WP_002263217.1	LysR family transcriptional regulator	PGM	1.68281
SMU_1462c	WP_002263083.1	FAD-binding oxidoreductase	GLYO1,DALAOX,DAAD,SARCOX	1.67947
SMU_1603	WP_002262786.1	lactoylglutathione lyase	GLYOX_1	1.6758
SMU_334	WP_002262513.1	argininosuccinate synthase	ARGSS	1.67285
SMU_991	WP_002262855.1	hypothetical protein	RNTR3,RNTR3c,RNTR4,RNTR2c,RNTR1c,RNTR1,RNTR4c,RNTR2	1.67239
SMU_1735	WP_002280638.1	acetyl-CoA carboxylase carboxyltransferase subunit beta	ACCOAC	1.67162
SMU_1115	WP_002262228.1	L-lactate dehydrogenase	LDH_L	1.67131
SMU_1522	WP_002262934.1	amino acid ABC transporter permease	GLNabc	1.65287
SMU_1598	WP_002262791.1	PTS cellobiose transporter subunit IIA	CELBpts	1.65224
SMU_1993	WP_002263429.1	metal ABC transporter permease	ZNabc	1.62507
SMU_2074	WP_002263793.1	anaerobic ribonucleoside-triphosphate reductase	RNTR4,RNTR3,RNTR1,RNTR2	1.61723
SMU_674	WP_002262984.1	phosphocarrier protein HPr	TREpts,CELBpts,FRUpts,ACGApts,MALTpts,SUCpts,GLCpts,MNLpts,MANpts,GAMpts	1.61626
SMU_1725	WP_002262550.1	acylphosphatase	ACYP_2	1.61626
SMU_1519	WP_002262931.1	amino acid ABC transporter ATP-binding protein	GLNabc	1.60919
SMU_1494	WP_002262465.1	tagatose-6-phosphate kinase	PFK_2	1.60635
SMU_2128	WP_002262431.1	dihydroxy-acid dehydratase	DHAD1,DHAD2	1.60472
SMU_1045c	WP_002262293.1	NAD kinase	NADK1,NADK5,NADK3,NADK2,NADK4,NADK	1.58508
SMU_1537	WP_002262949.1	glucose-1-phosphate adenylyltransferase subunit GlgD	GLGC	1.57002
SMU_1669	WP_002262675.1	ABC transporter substrate-binding protein	ILEabc,ALAabc,VALabc,THRabc,LEUabc	1.55518
SMU_1023	WP_002263223.1	oxaloacetate decarboxylase subunit alpha	OAADC,PC	1.54798
SMU_1190	WP_002262161.1	pyruvate kinase	PYK	1.54367
SMU_1569	WP_002262977.1	sugar ABC transporter permease	MALTabc	1.53392
SMU_1495	WP_002262464.1	galactose-6-phosphate isomerase subunit LacB	GAL6PI	1.53274
SMU_1666	WP_002262678.1	ABC transporter ATP-binding protein	ILEabc,ALAabc,VALabc,THRabc,LEUabc	1.52805
SMU_99	WP_002263577.1	fructose-bisphosphate aldolase	INSCR,FBA,FBA2	1.52622
SMU_1095	WP_002262245.1	ABC transporter permease/substrate-binding protein	PROabc,CRNabc,CHLabc,GLYBabc	1.51039
SMU_1843	WP_002262658.1	sucrose-6-phosphate hydrolase	FFSD,SUCR,RAFH	1.50341
SMU_1687	WP_002262586.1	manganese-dependent inorganic pyrophosphatase	PPA	1.50172
Downregulated
SMU_1432c	WP_002263108.1	endoglucanase	FLDR	-1.50815
SMU_35	WP_002263127.1	phosphoribosylglycinamide formyltransferase	GARFT	-1.51125
SMU_259	WP_002262736.1	ABC transporter ATP-binding protein	GTHRDabc	-1.51421
SMU_1445c	WP_002263098.1	ABC transporter ATP-binding protein	MOBDabc,TSULabc,PTRCabc,SPMDabc,THMabc,SULabc	-1.51598
SMU_263	WP_002262732.1	APC family permease	PTRCORNt7	-1.51913
SMU_874	WP_002262022.1	bifunctional homocysteine S-methyltransferase/methylenetetrahydrofolate reductase	HCYSMT,METS,MTHFR3	-1.51931
SMU_1084	WP_002262256.1	peptide chain release factor N(5)-glutamine methyltransferase	PPPGO	-1.51977
SMU_253	WP_002262741.1	D-alanyl-D-alanine carboxypeptidase	MDDCP1ex,MDDCP3ex,MDDCP5ex,MDDCP2ex,MDDCP4ex	-1.52061
SMU_495	WP_002263029.1	glycerol dehydrogenase	LALDO2x,ALR4x,GLYCDx	-1.52313
SMU_1578	WP_002262808.1	bifunctional biotin--[acetyl-CoA-carboxylase] synthetase/biotin operon repressor	ACCOAC	-1.52681
SMU_181	WP_002262028.1	mevalonate kinase	MEVK1,MEVK3,MEVK4,MEVK2	-1.52853
SMU_490	WP_002263033.1	glycyl-radical enzyme activating protein	OBTFL,PFL	-1.53526
SMU_641	WP_002261900.1	alcohol dehydrogenase catalytic domain-containing protein	FASm280,SBTD_D2,FASm220,THRD,FASm240,FASm260	-1.53869
SMU_456	WP_002262090.1	phospho-N-acetylmuramoyl-pentapeptide-transferase	PAPPT3	-1.53933
SMU_857	WP_002262006.1	uracil permease	URAt2	-1.5409
SMU_1176	WP_002262173.1	cation transporter	ZN2t4,COBALTt4,NI2t4,CD2t4pp,FE2t4	-1.54254
SMU_1384	WP_002262708.1	2-isopropylmalate synthase	IPPS	-1.54281
SMU_1848	WP_002262663.1	ion transporter	Kt1	-1.54972
SMU_1703c	WP_002262571.1	ECF transporter S component	RIBFLVt2	-1.55105
SMU_129	WP_002309917.1	dihydrolipoamide acetyltransferase	PDHbr	-1.55542
SMU_1164c	WP_002262184.1	ABC transporter ATP-binding protein	FE2abc,FE3abc	-1.55826
SMU_1437	WP_002263104.1	UDP-N-acetylglucosamine 2-epimerase (non-hydrolyzing)	UAG2E,UAG2EMA	-1.57196
SMU_97	WP_002263575.1	CTP synthase	CTPS1,CTPS2	-1.57203
SMU_1476c	WP_002263070.1	GTPase HflX	FE2abc	-1.5732
SMU_388	WP_002262630.1	AzlC family ABC transporter permease	VALt2r	-1.58563
SMU_569	WP_002263564.1	ferrous iron transport protein A	FE2abc	-1.59161
SMU_1021	WP_002263225.1	citrate lyase subunit alpha	CITL	-1.59844
SMU_525	WP_002279621.1	ABC transporter ATP-binding protein	GTHRDabc2	-1.59875
SMU_177	WP_002262024.1	PTS sugar transporter subunit IIC	CELLBpts_1	-1.60196
SMU_494	WP_002263030.1	fructose-6-phosphate aldolase	TALA,F6PA	-1.60302
SMU_765	WP_002263619.1	alkyl hydroperoxide reductase subunit F	TRDR	-1.608
SMU_435	WP_011074509.1	N-acetylglucosamine-6-phosphate deacetylase	AGDC	-1.61285
SMU_993	WP_002262857.1	ribosome biogenesis GTPase YlqF	FE3Gabc,FE2Gabc	-1.61344
SMU_1966c	WP_002263455.1	sugar ABC transporter substrate-binding protein	RIBabc	-1.61344
SMU_1677	WP_002262594.1	UDP-N-acetylmuramoyl-L-alanyl-D-glutamate--L-lysine ligase	UAAGDS	-1.61504
SMU_1386	WP_002262709.1	uridine kinase	CYTDK1,URIK1,ITCY,CYTDK2,URIK2,URIK3	-1.61933
SMU_827	WP_002261977.1	ABC transporter permease	G1PTT	-1.62294
SMU_517	WP_002262038.1	pantetheine-phosphate adenylyltransferase	PTPATi	-1.62646
SMU_901	WP_002262894.1	CCA tRNA nucleotidyltransferase	DADK	-1.63183
SMU_182	WP_002262029.1	metal ABC transporter ATP-binding protein	ZNabc,MNabc	-1.63682
SMU_1742c	WP_002262534.1	enoyl-[acyl-carrier-protein] reductase FabK	EAR160x,EAR180x,EAR181x,EAR40x,EAR120x,EAR121x,EAR80x,EAR141x,EAR140x,EAR161x,EAR60x,EAR100x	-1.63756
SMU_1013c	WP_002263232.1	CitMHS family transporter	CITt14,CITt2r	-1.63882
SMU_1851	WP_002262666.1	excinuclease ABC subunit UvrA	SERabc	-1.64441
SMU_51	WP_002263391.1	5-(carboxyamino)imidazole ribonucleotide synthase	AIRC1,AIRC2	-1.6454
SMU_1086	WP_002262254.1	thymidine kinase	TMDK1,DURIK1	-1.64954
SMU_274	WP_002262723.1	L-ribulose-5-phosphate 3-epimerase	X5PL3E	-1.65952
SMU_537	WP_002262056.1	tryptophan synthase subunit beta	TRPS2,TRPS1	-1.66012
SMU_493	WP_002263031.1	glycyl radical protein	OBTFL,PFL	-1.6606
SMU_1482c	WP_002263066.1	alpha/beta fold hydrolase	OXOAEL	-1.6631
SMU_970	WP_002262834.1	dihydroneopterin aldolase	DHNPA2r,DHNPA_1	-1.69295
SMU_873	WP_002262021.1	5-methyltetrahydropteroyltriglutamate--homocysteine S-methyltransferase	METS	-1.70604
SMU_1106c	WP_002262236.1	histidine phosphatase family protein	PGM	-1.70638
SMU_572	WP_002263561.1	bifunctional methylenetetrahydrofolate dehydrogenase/methenyltetrahydrofolate cyclohydrolase	MTHFC,MTHFD	-1.70943
SMU_352	WP_002264901.1	ribulose-phosphate 3-epimerase	RPE	-1.71014
SMU_1041	WP_002262297.1	ABC transporter ATP-binding protein	NAabcO	-1.7135
SMU_1223	WP_002263219.1	dihydroorotate dehydrogenase	DHORDi	-1.7192
SMU_32	WP_002263130.1	amidophosphoribosyltransferase	GLUPRT,ASNS1	-1.72829
SMU_1252	WP_002263192.1	glycerate kinase	GLYCK,GLYCK2	-1.73305
SMU_346	WP_002267310.1	nitroreductase family protein	FLDO	-1.74266
SMU_1382	WP_002262706.1	3-isopropylmalate dehydratase large subunit	IPPMIb,IPPMIa	-1.74296
SMU_939	WP_002263658.1	type 2 isopentenyl-diphosphate Delta-isomerase	IPDDI	-1.74939
SMU_646	WP_002261895.1	HAD-IA family hydrolase	PGLYCP	-1.75377
SMU_26	WP_002263136.1	phosphate acyltransferase PlsX	ACPPAT120,G3PAT181,G3PAT180,G3PAT140,ACPPAT141,ACPPAT140,ACPPAT180,G3PAT120,ACPPAT160,ACPPAT161,G3PAT160,G3PAT161,ACPPAT181	-1.76744
SMU_1082	WP_002262258.1	serine hydroxymethyltransferase	THFAT,ALATA_L2,THRA2i,ALATA_D2,THRAi,GHMT2r	-1.7681
SMU_1266	WP_002263178.1	imidazole glycerol phosphate synthase subunit HisH	HSTPTr,PHETA1,IG3PS,TYRTA	-1.77739
SMU_30	WP_002263132.1	phosphoribosylformylglycinamidine synthase	PRFGS	-1.79495
SMU_535	WP_002262054.1	indole-3-glycerol phosphate synthase TrpC	PRAIi,IGPS	-1.79549
SMU_34	WP_002263128.1	phosphoribosylformylglycinamidine cyclo-ligase	PRAIS_1,PRAIS	-1.79924
SMU_244	WP_002262750.1	undecaprenyl-diphosphate phosphatase	UDCPDP,UDCPDPex	-1.79981
SMU_534	WP_002262053.1	anthranilate phosphoribosyltransferase	ANPRT	-1.80262
SMU_1744	WP_002262532.1	ketoacyl-ACP synthase III	3OAS161,ACOATA,KAS14,KAS15,MACPD,3OAS80,3OAS100,3OAS121,3OAS160,3OAS181,3OAS120,3OAS180,3OAS60,3OAS140,3OAS141	-1.81497
SMU_449	WP_002262085.1	glutamate 5-kinase	GLU5K	-1.82067
SMU_119	WP_002263486.1	S-(hydroxymethyl)glutathione dehydrogenase/class III alcohol dehydrogenase	LCADi,ALCD19,FALDH2	-1.82069
SMU_1265	WP_002263872.1	1-(5-phosphoribosyl)-5-[(5-phosphoribosylamino)methylideneamino]imidazole-4-carboxamide isomerase	PRMICI	-1.83729
SMU_118c	WP_002263487.1	S-formylglutathione hydrolase	SFGTHi	-1.84396
SMU_115	WP_002263697.1	PTS transporter subunit EIIA	MANpts	-1.86087
SMU_1271	WP_002263173.1	ATP phosphoribosyltransferase	ATPPRT	-1.89344
SMU_1178c	WP_002262171.1	amino acid ABC transporter ATP-binding protein	ASPabc,GLNabc	-1.89576
SMU_1747c	WP_002262529.1	HAD family phosphatase	PGLYCP	-1.92623
SMU_943c	WP_002266471.1	hydroxymethylglutaryl-CoA synthase	HMGCOASi	-1.9464
SMU_1826	WP_002263471.1	pyridoxal phosphate-dependent aminotransferase	ALATA_L,ASPTA	-1.9797
SMU_256	WP_002262739.1	ABC transporter permease	DIPEPabc15	-2.06281
SMU_856	WP_002262005.1	bifunctional pyr operon transcriptional regulator/uracil phosphoribosyltransferase PyrR	UPPRT	-2.28412
SMU_1618	WP_002262772.1	diacylglycerol kinase	DAGK_BS,DAGK181,DAGK160,DAGK161,DAGK180,DAGK120,DAGK140	-3.03235
.	WP_002263183.1	phosphoribosyl-ATP diphosphatase	PRAMPC_1,PRATPP	-3.10749
SMU_325	WP_002262522.1	dUTP diphosphatase	DUTPDP	-7.07148
