# Supplementary material for: Redox Gene Regulator Rex Diverts FermentationIn Concert with Low Charge Export in Streptococcus mutans
Source: Research Square preprint supplement (doi:10.21203/rs.3.rs-2071905/v1), 2022-09-27
Supplement: Supplementary file 2 [file c8fa4c6eae6b049e35ea324f.xlsx]

## Sheet: Sheet1
Supplementary Table. 4 | List of differentially expressed genes associated with metabolism of S. mutans wild type (WT) and rex mutant with fold change 1.5.
Gene ID	Protein_ID	Product	WT/Rex_mutant
Up regulated
SMU_1598	WP_002262791.1	PTS cellobiose transporter subunit IIA	258.703
SMU_1596	WP_002262793.1	PTS cellobiose transporter subunit IIC	211.695
SMU_1600	WP_002262789.1	PTS cellobiose transporter subunit IIB	130.582
SMU_206c	WP_002310800.1	hypothetical protein	115.373
SMU_1599	WP_002352342.1	BglG family transcription antiterminator	114.161
SMU_205c	WP_002268352.1	hypothetical protein	94.8105
SMU_195c	WP_002310784.1	hypothetical protein	79.1121
SMU_211c	WP_002310804.1	hypothetical protein	78.0288
.	WP_002262581.1	teichoic acid D-Ala incorporation-associated protein DltX	75.5218
SMU_1597c	WP_002262792.1	hypothetical protein	73.2357
SMU_1601	WP_002262788.1	6-phospho-beta-glucosidase	72.3665
SMU_1367c	WP_002263794.1	class I SAM-dependent methyltransferase	40.087
SMU_1337c	WP_002267534.1	mutanobactin A biosynthesis alpha/beta hydrolase MubM	35.676
SMU_1914c	WP_002265368.1	ComC/BlpC family leader-containing pheromone/bacteriocin	31.5551
SMU_1336	WP_002273736.1	mutanobactin A biosynthesis transacylase MubI	30.8009
.	WP_002263017.1	hypothetical protein	25.5405
SMU_40	WP_002309887.1	type II toxin-antitoxin system mRNA interferase toxin, RelE/StbE family	25.4952
SMU_1335c	WP_002273737.1	mutanobactin A biosynthesis reductase MubJ	24.768
SMU_1895c	WP_002263734.1	ComC/BlpC family leader-containing pheromone/bacteriocin	23.1117
SMU_999	WP_002262863.1	hypothetical protein	20.2364
SMU_191c	WP_002310774.1	site-specific integrase	19.7723
SMU_1338c	WP_002267533.1	mutanobactin A system MFS transporter MubZ	18.596
.	.	RNase P RNA component class B	18.2727
SMU_651c	WP_002261890.1	ABC transporter substrate-binding protein	16.9256
SMU_1287	WP_002263159.1	MerR family transcriptional regulator	16.5799
SMU_1334	WP_002267537.1	mutanobactin A biosynthesis phosphopantetheinyl transferase MubP	16.3765
SMU_1908c	WP_002265308.1	hypothetical protein	12.814
SMU_1915	WP_002267610.1	ComC/BlpC family leader-containing pheromone/bacteriocin	12.4815
SMU_1743	WP_002262533.1	acyl carrier protein	12.3466
SMU_849	WP_002261998.1	50S ribosomal protein L27	12.2769
SMU_2080	WP_002262387.1	LytTR family transcriptional regulator	12.0938
SMU_379	WP_002262470.1	hypothetical protein	11.6258
SMU_1775c	WP_002263679.1	hypothetical protein	11.3936
SMU_685	WP_002263338.1	SMI1/KNR4 family protein	11.1197
SMU_652c	WP_002261889.1	ABC transporter ATP-binding protein	10.9013
SMU_r12	.	16S ribosomal RNA	10.5644
SMU_1053	WP_002262286.1	redox-sensing transcriptional repressor Rex	10.3848
SMU_213c	WP_002280853.1	hypothetical protein	10.3508
SMU_199c	WP_002310791.1	conjugal transfer protein	10.3198
.	WP_002263205.1	helix-turn-helix transcriptional regulator	10.0487
SMU_1294	WP_002263152.1	flavodoxin	9.93199
SMU_1956c	WP_002262150.1	hypothetical protein	9.89801
SMU_1984	WP_002263437.1	prepilin-type N-terminal cleavage/methylation domain-containing protein	9.87907
.	WP_002263545.1	type II toxin-antitoxin system HicA family toxin	9.81911
SMU_1361c	WP_002263281.1	TetR/AcrR family transcriptional regulator	9.65385
SMU_1902c	WP_002263740.1	hypothetical protein	9.31932
.	WP_002279759.1	hypothetical protein	9.00914
SMU_933	WP_002263652.1	amino acid ABC transporter substrate-binding protein	9.00743
SMU_1896c	WP_002263733.1	ComC/BlpC family leader-containing pheromone/bacteriocin	8.96125
SMU_1871c	WP_002263361.1	colicin V production protein	8.94233
.	WP_019313410.1	hypothetical protein	8.79641
SMU_935	WP_002263654.1	amino acid ABC transporter permease	8.66886
.	WP_080007638.1	conjugal transfer protein	8.66584
.	WP_002282891.1	hypothetical protein	8.04754
SMU_653c	WP_002261888.1	ABC transporter permease subunit	8.03382
SMU_609	WP_002352220.1	YSIRK-type signal peptide-containing protein	7.54842
SMU_541	WP_002262060.1	YqgQ family protein	7.538
SMU_984	WP_002273859.1	CHAP domain-containing protein	7.33334
SMU_1832	WP_002263466.1	hypothetical protein	7.2525
SMU_932	WP_002263651.1	uroporphyrinogen decarboxylase	7.19643
SMU_1507c	WP_002265227.1	PqqD family protein	7.11719
SMU_373	WP_002262476.1	methyltransferase domain-containing protein	7.03452
SMU_1553c	WP_002262963.1	hypothetical protein	7.01526
SMU_1782	WP_002263685.1	DUF960 domain-containing protein	6.90871
SMU_2106c	WP_002263788.1	transcriptional regulator	6.68688
SMU_1837	WP_002310594.1	3-deoxy-7-phosphoheptulonate synthase	6.5081
.	WP_002263576.1	hypothetical protein	6.41708
SMU_52	WP_002263392.1	hypothetical protein	6.33543
SMU_768c	WP_002261922.1	hypothetical protein	6.30692
SMU_934	WP_002263653.1	amino acid ABC transporter permease	6.21985
SMU_1069c	WP_002262271.1	DUF3021 family protein	6.20893
SMU_1610	WP_002262780.1	50S ribosomal protein L33	6.10155
SMU_1913c	WP_002310604.1	hypothetical protein	6.00683
SMU_1961c	WP_002263459.1	PTS fructose transporter subunit IIA	5.93758
SMU_1059	WP_002262281.1	hypothetical protein	5.83674
SMU_616	WP_002263747.1	hypothetical protein	5.82837
SMU_220c	WP_002310809.1	hypothetical protein	5.74526
SMU_215c	WP_002310805.1	hypothetical protein	5.73563
SMU_1206c	WP_002263263.1	GTP pyrophosphokinase	5.62277
SMU_27	WP_002263135.1	acyl carrier protein	5.56068
SMU_207c	WP_002310801.1	XRE family transcriptional regulator	5.55003
SMU_555	WP_002262072.1	YggT family protein	5.42287
SMU_201c	WP_002310793.1	conjugal transfer protein	5.37618
SMU_1882c	WP_002263351.1	hypothetical protein	5.36549
SMU_198c	WP_002310789.1	conjugal transfer protein	5.2941
SMU_504	WP_002263020.1	DNA adenine methylase	5.2848
SMU_930c	WP_002263650.1	LysR family transcriptional regulator	5.25207
SMU_1554c	WP_002262964.1	hypothetical protein	5.23111
SMU_1250c	WP_002263194.1	hypothetical protein	5.23104
SMU_150	WP_002263727.1	hypothetical protein	5.19081
SMU_411c	WP_002268777.1	hypothetical protein	5.1823
SMU_47	WP_002263386.1	HNH endonuclease	5.17909
SMU_936	WP_002263655.1	amino acid ABC transporter ATP-binding protein	5.11983
SMU_457	WP_019319357.1	hypothetical protein	5.10957
SMU_499	WP_002263025.1	ComF family protein	5.03163
SMU_46	WP_002263385.1	hypothetical protein	5.00667
SMU_55	WP_002282951.1	hypothetical protein	4.94322
SMU_490	WP_002263033.1	glycyl-radical enzyme activating protein	4.93898
SMU_1948	WP_002262143.1	preprotein translocase subunit SecE	4.91672
SMU_1201c	WP_002263259.1	DUF2969 family protein	4.90669
SMU_10	WP_002262641.1	septum formation initiator family protein	4.87513
SMU_1910c	WP_002263913.1	hypothetical protein	4.86332
SMU_1604c	WP_002262785.1	PadR family transcriptional regulator	4.85419
SMU_1997	WP_002263585.1	sigma-70 family RNA polymerase sigma factor	4.83446
SMU_1070c	WP_002262270.1	LytTR family transcriptional regulator	4.807
SMU_1985	WP_002263436.1	type II secretion system F family protein	4.79981
SMU_1539	WP_002262951.1	1,4-alpha-glucan branching protein GlgB	4.72341
SMU_1094	WP_002262246.1	ABC transporter ATP-binding protein	4.72115
SMU_1157c	WP_002262190.1	hypothetical protein	4.53088
SMU_2162c	WP_002262651.1	23S rRNA (pseudouridine(1915)-N(3))-methyltransferase RlmH	4.52778
SMU_1260c	WP_002263184.1	DivIVA domain-containing protein	4.51737
SMU_2003a	WP_000868345.1	50S ribosomal protein L36	4.46659
SMU_1906c	WP_002263744.1	hypothetical protein	4.43521
SMU_202c	WP_002310795.1	hypothetical protein	4.41916
SMU_2139c	WP_002262441.1	50S ribosomal protein L9	4.35813
SMU_797	WP_002261951.1	DUF4649 family protein	4.34622
SMU_313	WP_002262905.1	PTS glucitol/sorbitol transporter subunit IIA	4.33535
SMU_1052	WP_002262287.1	DUF1831 domain-containing protein	4.22824
SMU_1689	WP_002262584.1	D-alanine--poly(phosphoribitol) ligase subunit DltC	4.202
SMU_804	WP_002261957.1	FRG domain-containing protein	4.15866
SMU_2096c	WP_002262403.1	hypothetical protein	4.14171
SMU_1942c	WP_002262138.1	amino acid ABC transporter substrate-binding protein	4.08225
.	WP_002263736.1	hypothetical protein	4.07911
SMU_1160c	WP_002262187.1	hypothetical protein	4.04852
SMU_309	WP_002262909.1	PTS transporter subunit EIIA	4.04623
SMU_588	WP_002262100.1	YpmS family protein	4.01205
SMU_593	WP_002263255.1	transcriptional repressor	3.99012
SMU_210c	WP_002303506.1	hypothetical protein	3.98978
SMU_308	WP_002262910.1	SDR family oxidoreductase	3.98204
SMU_1987	WP_002263435.1	Flp pilus assembly complex ATPase component TadA	3.97936
SMU_1648c	WP_002262696.1	hypothetical protein	3.92521
SMU_448	WP_011074511.1	PepSY domain-containing protein	3.91811
SMU_61	WP_002263400.1	helix-turn-helix transcriptional regulator	3.8866
SMU_589	WP_002262099.1	HU family DNA-binding protein	3.81046
SMU_1982c	WP_002263439.1	hypothetical protein	3.79474
SMU_1414c	WP_002352329.1	TIGR01906 family membrane protein	3.7561
SMU_503c	WP_002263021.1	hypothetical protein	3.74584
SMU_378	WP_002262471.1	hypothetical protein	3.73487
SMU_1845	WP_002262660.1	transcription antitermination factor NusB	3.72406
SMU_239c	WP_002262754.1	hypothetical protein	3.7035
SMU_1161c	WP_002262186.1	abortive infection family protein	3.64496
SMU_1535	WP_002262947.1	glycogen/starch/alpha-glucan phosphorylase	3.62934
SMU_2137c	WP_002262439.1	hypothetical protein	3.58902
.	WP_002262389.1	hypothetical protein	3.57234
SMU_09	WP_002262642.1	RNA-binding S4 domain-containing protein	3.56166
SMU_31	WP_002263131.1	hypothetical protein	3.53533
.	WP_080007653.1	hypothetical protein	3.53384
SMU_758c	WP_002263623.1	DUF3270 domain-containing protein	3.50574
SMU_1237c	WP_002263206.1	nuclear transport factor 2 family protein	3.49947
SMU_1941	WP_002262137.1	O-sialoglycoprotein endopeptidase	3.46209
SMU_310	WP_002262908.1	transcriptional regulator	3.41818
SMU_1776c	WP_002263680.1	type II toxin-antitoxin system RelB/DinJ family antitoxin	3.40436
SMU_1538	WP_002262950.1	glucose-1-phosphate adenylyltransferase	3.38387
.	.	6S RNA	3.37391
SMU_1818c	WP_002263478.1	hypothetical protein	3.36918
SMU_962	WP_002262827.1	acyl-CoA/acyl-ACP dehydrogenase	3.36538
SMU_1537	WP_002262949.1	glucose-1-phosphate adenylyltransferase subunit GlgD	3.35724
SMU_312	WP_002262906.1	PTS glucitol/sorbitol transporter subunit IIB	3.35402
SMU_1536	WP_002262948.1	glycogen synthase GlgA	3.3507
SMU_1253c	WP_002263191.1	GNAT family N-acetyltransferase	3.29732
SMU_222c	WP_002263778.1	hypothetical protein	3.28965
SMU_575c	WP_002262111.1	CidA/LrgA family protein	3.28165
SMU_818	WP_000048058.1	30S ribosomal protein S21	3.27553
SMU_1365c	WP_011074618.1	mutanobactin A system ABC transporter permease subunit MubY	3.2642
SMU_166	WP_002262996.1	hypothetical protein	3.25942
SMU_311	WP_002262907.1	PTS sorbitol transporter subunit IIC	3.24452
SMU_420	WP_002262601.1	YlxQ-related RNA-binding protein	3.24431
SMU_1061	WP_002262279.1	putative DNA-binding protein	3.19738
SMU_1509	WP_002352338.1	Rgg/GadR/MutR family transcriptional regulator	3.19003
SMU_219	WP_002268366.1	ImmA/IrrE family metallo-endopeptidase	3.18423
SMU_1180	WP_002262169.1	alkylphosphonate utilization protein	3.18075
SMU_1524c	WP_002262936.1	DNA-directed RNA polymerase subunit beta	3.16922
SMU_1188	WP_002262163.1	signal peptidase I	3.14934
SMU_208c	WP_011074490.1	transposase	3.14385
SMU_911c	WP_002262901.1	DUF308 domain-containing protein	3.13206
.	WP_002266214.1	ClbS/DfsB family four-helix bundle protein	3.10831
SMU_299c	WP_002262918.1	garvicin Q family class II bacteriocin	3.08567
SMU_1772c	WP_002263675.1	hypothetical protein	3.07992
SMU_314	WP_002262904.1	hypothetical protein	3.07108
SMU_196c	WP_002310786.1	CHAP domain-containing protein	3.05685
SMU_2134	WP_002262436.1	TetR family transcriptional regulator	3.0523
SMU_2129c	WP_002262432.1	DUF59 domain-containing protein	3.04312
SMU_1969c	WP_002263452.1	MarR family transcriptional regulator	3.04174
SMU_1933c	WP_002262129.1	energy-coupling factor transporter transmembrane protein EcfT	3.03109
SMU_141	WP_002263598.1	DUF1275 domain-containing protein	3.0215
SMU_961	WP_002262826.1	carboxymuconolactone decarboxylase family protein	3.01605
SMU_1593c	WP_002262795.1	CDP-archaeol synthase	3.01512
SMU_727	WP_002266067.1	MerR family transcriptional regulator	2.99911
SMU_1704	WP_002262570.1	PadR family transcriptional regulator	2.97828
SMU_217c	WP_002310807.1	hypothetical protein	2.91366
.	WP_002263129.1	hypothetical protein	2.90662
SMU_25	WP_002263137.1	DNA repair protein RecO	2.90301
SMU_591c	WP_002263257.1	hypothetical protein	2.8985
SMU_1561	WP_002262970.1	NAD(P)-binding domain-containing protein	2.86426
SMU_1577c	WP_002262809.1	hypothetical protein	2.8429
SMU_197c	WP_002310787.1	hypothetical protein	2.84285
SMU_1574c	WP_002352340.1	haloacid dehalogenase-like hydrolase	2.82193
.	WP_002263670.1	hypothetical protein	2.80108
SMU_929c	WP_002263648.1	DUF1304 family protein	2.79004
SMU_180	WP_002262027.1	flavocytochrome c	2.77453
SMU_526c	WP_002262046.1	MerR family transcriptional regulator	2.77187
SMU_844	WP_002261994.1	GNAT family N-acetyltransferase	2.75831
SMU_1205c	WP_002263262.1	hypothetical protein	2.70271
SMU_813	WP_002261964.1	helix-turn-helix transcriptional regulator	2.68828
SMU_1641c	WP_002262704.1	CsbD family protein	2.65028
SMU_730	WP_002263301.1	AbrB/MazE/SpoVT family DNA-binding domain-containing protein	2.63958
SMU_1938c	WP_002262134.1	ABC transporter permease	2.63663
SMU_173	WP_002262989.1	type II toxin-antitoxin system PemK/MazF family toxin	2.63427
SMU_1442c	WP_002267737.1	YehR family protein	2.63094
SMU_1955	WP_002352364.1	co-chaperone GroES	2.63093
SMU_1381	WP_002262705.1	3-isopropylmalate dehydratase small subunit	2.62692
SMU_883	WP_002262877.1	alpha-glucosidase	2.62492
SMU_2160	WP_011074696.1	YfhO family protein	2.61781
SMU_985	WP_002352266.1	glycoside hydrolase family 1 protein	2.60905
SMU_853	WP_002262002.1	signal peptidase II	2.59011
SMU_1558c	WP_002262968.1	GNAT family N-acetyltransferase	2.58832
SMU_970	WP_002262834.1	dihydroneopterin aldolase	2.56614
SMU_140	WP_002263597.1	NAD(P)/FAD-dependent oxidoreductase	2.54524
SMU_1299c	WP_002263147.1	acetate kinase	2.54367
SMU_695	WP_002263330.1	LysM peptidoglycan-binding domain-containing protein	2.54057
SMU_1803c	WP_002263503.1	DUF4230 domain-containing protein	2.53265
SMU_79	WP_002263414.1	glycoside hydrolase family 32 protein	2.52688
SMU_58	WP_002263397.1	hypothetical protein	2.5244
SMU_1097c	WP_002262243.1	MarR family transcriptional regulator	2.51111
SMU_1195	WP_002262156.1	permease	2.50763
SMU_489	WP_002263034.1	S1 RNA-binding domain-containing protein	2.50639
SMU_785	WP_002261939.1	shikimate kinase	2.49141
SMU_1405c	WP_002263549.1	type II CRISPR RNA-guided endonuclease Cas9	2.48914
SMU_252	WP_002262742.1	hypothetical protein	2.48693
SMU_36	WP_002263126.1	suppressor of fused domain protein	2.48626
SMU_139	WP_002263596.1	oxalate decarboxylase family bicupin	2.4661
SMU_574c	WP_002263784.1	antiholin-like protein LrgB	2.44184
SMU_2087	WP_002262394.1	DNA-3-methyladenine glycosylase I	2.44021
SMU_692	WP_002263332.1	EbsA family protein	2.41929
SMU_172	WP_002262990.1	AbrB/MazE/SpoVT family DNA-binding domain-containing protein	2.39131
SMU_845	WP_002261995.1	DUF1211 domain-containing protein	2.38252
SMU_1631	WP_002263610.1	peptidyl-prolyl cis-trans isomerase	2.38216
SMU_983	WP_002262846.1	AraC family transcriptional regulator	2.37858
SMU_1259	WP_002263185.1	restriction endonuclease	2.37098
SMU_956	WP_002262823.1	ATP-dependent Clp protease ATP-binding subunit	2.364
SMU_1129	WP_002262214.1	response regulator transcription factor	2.36213
SMU_376	WP_002262473.1	aminotransferase class III-fold pyridoxal phosphate-dependent enzyme	2.36162
SMU_833	WP_002261983.1	glycosyltransferase family 2 protein	2.36058
SMU_2154c	WP_002262454.1	insulinase family protein	2.35864
SMU_1975c	WP_002263446.1	CPBP family intramembrane metalloprotease	2.35342
SMU_556	WP_002352218.1	RNA-binding protein	2.35225
SMU_78	WP_002263413.1	fructan beta-fructosidase	2.34904
SMU_1252	WP_002263192.1	glycerate kinase	2.33282
SMU_1570	WP_002262978.1	sugar ABC transporter permease	2.32701
SMU_1552c	WP_002262962.1	EXLDI protein	2.32699
SMU_2027	WP_002262342.1	helix-turn-helix domain-containing protein	2.31967
SMU_1957	WP_002262151.1	PTS system mannose/fructose/sorbose family transporter subunit IID	2.31651
SMU_1609c	WP_002262781.1	preprotein translocase subunit SecG	2.30671
SMU_1999c	WP_002310640.1	gamma-glutamylcysteine synthetase	2.29394
SMU_1023	WP_002263223.1	oxaloacetate decarboxylase subunit alpha	2.29134
SMU_1937	WP_002262133.1	carbon-nitrogen family hydrolase	2.27988
SMU_1037c	WP_002262301.1	HAMP domain-containing histidine kinase	2.27676
SMU_1710c	WP_002262564.1	membrane protein insertion efficiency factor YidD	2.27106
SMU_975	WP_002262839.1	ABC transporter permease	2.26496
SMU_1909c	WP_002263912.1	hypothetical protein	2.26055
SMU_35	WP_002263127.1	phosphoribosylglycinamide formyltransferase	2.25481
SMU_684	WP_002263339.1	hypothetical protein	2.25371
SMU_34	WP_002263128.1	phosphoribosylformylglycinamidine cyclo-ligase	2.24458
SMU_1545c	WP_002262956.1	queuosine transporter QueT	2.23478
SMU_1022	WP_002263224.1	citrate lyase holo-[acyl-carrier protein] synthase	2.23322
SMU_283	WP_002278706.1	hypothetical protein	2.21766
SMU_394c	WP_002262625.1	YbaB/EbfC family nucleoid-associated protein	2.21434
SMU_1256c	WP_002263188.1	hypothetical protein	2.2115
SMU_1067c	WP_002262273.1	ABC transporter permease subunit	2.20996
SMU_470	WP_002263051.1	DUF1273 domain-containing protein	2.20918
SMU_1614	WP_002262776.1	DNA-formamidopyrimidine glycosylase	2.19719
SMU_592c	WP_002263256.1	TetR/AcrR family transcriptional regulator	2.19341
SMU_571	WP_002263562.1	FeoB-associated Cys-rich membrane protein	2.17559
SMU_1821c	WP_002263475.1	Asp-tRNA(Asn)/Glu-tRNA(Gln) amidotransferase subunit GatC	2.17073
SMU_606	WP_002263244.1	hypothetical protein	2.17066
SMU_1728	WP_002262548.1	transcription elongation factor GreA	2.16875
SMU_20	WP_002263142.1	rod shape-determining protein MreC	2.16216
SMU_1346	WP_002310357.1	mutanobactin A biosynthesis thioesterase MubT	2.15033
SMU_1485c	WP_002263063.1	AAA domain-containing protein	2.14641
SMU_757	WP_002263624.1	YtxH domain-containing protein	2.14466
SMU_137	WP_002263594.1	NAD-dependent malic enzyme	2.14025
SMU_1701c	WP_002262573.1	CidA/LrgA family protein	2.13923
SMU_1127	WP_011074586.1	30S ribosomal protein S20	2.139
SMU_423	WP_002275977.1	ComC/BlpC family leader-containing pheromone/bacteriocin	2.13898
SMU_1317c	WP_002263711.1	hypothetical protein	2.13842
SMU_1797c	WP_002266441.1	ribosome silencing factor	2.13342
SMU_642	WP_002261899.1	hypothetical protein	2.12559
SMU_1569	WP_002262977.1	sugar ABC transporter permease	2.12347
SMU_1576c	WP_002262810.1	hypothetical protein	2.12229
SMU_1042	WP_002262296.1	hypothetical protein	2.11518
SMU_1534	WP_002262946.1	F0F1 ATP synthase subunit C	2.11489
SMU_947	WP_002262814.1	dihydrofolate reductase	2.11149
SMU_1372c	WP_002263639.1	helix-turn-helix domain-containing protein	2.10861
SMU_218	WP_002268365.1	helix-turn-helix transcriptional regulator	2.10608
SMU_2050c	WP_002262361.1	50S ribosomal protein L11 methyltransferase	2.10317
SMU_817	WP_002261968.1	transporter substrate-binding domain-containing protein	2.10041
SMU_1131c	WP_002262213.1	hypothetical protein	2.09366
SMU_1400c	WP_002263544.1	HicB family protein	2.09078
SMU_1618	WP_002262772.1	diacylglycerol kinase	2.08498
SMU_43	WP_002263383.1	DNA methyltransferase	2.06171
SMU_569	WP_002263564.1	ferrous iron transport protein A	2.06014
SMU_465	WP_002262098.1	ammonia-dependent NAD(+) synthetase	2.059
SMU_1939c	WP_002262135.1	methionine ABC transporter ATP-binding protein	2.05604
SMU_2155	WP_002262455.1	S4 domain-containing protein YaaA	2.05574
SMU_782	WP_002261936.1	YlbF/YmcA family competence regulator	2.04356
SMU_1670c	WP_002262674.1	YlbG family protein	2.03959
SMU_1068c	WP_002262272.1	ABC transporter ATP-binding protein	2.03474
SMU_1780	WP_002263683.1	recombination regulator RecX	2.02027
SMU_1790c	WP_002263514.1	MerR family transcriptional regulator	1.99828
SMU_1398	WP_002262721.1	LexA family transcriptional regulator	1.98816
SMU_1034c	WP_002262304.1	tyrosine recombinase XerS	1.98035
SMU_103	WP_002263581.1	PTS system, IIA component	1.97591
SMU_96	WP_002263574.1	DNA-directed RNA polymerase subunit delta	1.97149
SMU_1846c	WP_002262661.1	Asp23/Gls24 family envelope stress response protein	1.94397
SMU_1883	WP_002263350.1	DUF956 family protein	1.9429
SMU_1562	WP_002262971.1	potassium uptake protein TrkA	1.93451
SMU_560c	WP_002263571.1	DUF1827 family protein	1.92547
SMU_1404c	WP_002352326.1	type II CRISPR-associated endonuclease Cas1	1.91966
SMU_1402c	WP_002263546.1	type II-A CRISPR-associated protein Csn2	1.91803
.	WP_002263710.1	hypothetical protein	1.91391
SMU_07	WP_002262644.1	aminoacyl-tRNA hydrolase	1.91234
SMU_628	WP_002261913.1	DNA polymerase III subunit delta	1.90806
SMU_1571	WP_002262979.1	sn-glycerol-3-phosphate ABC transporter ATP-binding protein UgpC	1.88196
SMU_1963c	WP_002263458.1	extracellular solute-binding protein	1.87428
SMU_986c	WP_002262849.1	helix-turn-helix transcriptional regulator	1.86342
SMU_505	WP_002267037.1	site-specific DNA-methyltransferase	1.8582
SMU_1255c	WP_080007642.1	STAS-like domain-containing protein	1.85571
SMU_1680c	WP_002262591.1	hypothetical protein	1.84186
SMU_1370c	WP_161601738.1	IS3 family transposase	1.84082
SMU_1664c	WP_002262680.1	CBS domain-containing protein	1.83838
SMU_1479	WP_002263068.1	DUF3042 family protein	1.83525
SMU_581	WP_002262107.1	exodeoxyribonuclease VII small subunit	1.82777
SMU_42	WP_002263382.1	Abi family protein	1.82607
SMU_60	WP_002263399.1	DNA alkylation repair protein	1.82109
SMU_1644c	WP_002262700.1	hypothetical protein	1.80775
SMU_510c	WP_002263013.1	hypothetical protein	1.80653
SMU_1498	WP_002262461.1	DeoR/GlpR transcriptional regulator	1.79893
SMU_1628	WP_002263608.1	DUF3397 family protein	1.79615
SMU_1116c	WP_002262227.1	hypothetical protein	1.7905
SMU_657	WP_002261884.1	lantibiotic immunity ABC transporter MutG family permease subunit	1.77045
SMU_116	WP_002265910.1	tagatose-bisphosphate aldolase	1.76795
SMU_28	WP_080007628.1	ATP-binding cassette domain-containing protein	1.7529
SMU_1193	WP_002262158.1	GntR family transcriptional regulator	1.74872
SMU_186	WP_002262032.1	metal-dependent transcriptional regulator	1.74477
SMU_550	WP_002262067.1	FtsQ-type POTRA domain-containing protein	1.73681
SMU_1254	WP_002263190.1	HAD family hydrolase	1.73568
SMU_1093	WP_002262247.1	ABC transporter permease	1.73536
SMU_1057	WP_002262283.1	DUF3307 domain-containing protein	1.72736
SMU_2063	WP_002262371.1	ferrochelatase	1.72106
SMU_594	WP_002263254.1	hypothetical protein	1.72091
SMU_2136c	WP_002262438.1	hypothetical protein	1.71821
SMU_807	WP_002261960.1	CPBP family intramembrane metalloprotease	1.71457
SMU_402	WP_002262619.1	formate C-acetyltransferase	1.71434
SMU_13	WP_002262638.1	tRNA lysidine(34) synthetase TilS	1.70552
SMU_1861c	WP_002263367.1	hypothetical protein	1.69864
SMU_1960c	WP_002263460.1	PTS sugar transporter subunit IIB	1.6967
SMU_1742c	WP_002262534.1	enoyl-[acyl-carrier-protein] reductase FabK	1.69425
SMU_179	WP_002262026.1	NAD(P)H-dependent oxidoreductase	1.69305
SMU_1009	WP_002263236.1	sensor histidine kinase	1.68891
SMU_110	WP_002263840.1	Rgg/GadR/MutR family transcriptional regulator	1.68845
SMU_2094c	WP_002262401.1	Crp/Fnr family transcriptional regulator	1.68737
SMU_2054c	WP_002262363.1	DUF3013 family protein	1.67844
SMU_1723c	WP_002262552.1	HD domain-containing protein	1.66883
SMU_325	WP_002262522.1	dUTP diphosphatase	1.66876
SMU_264	WP_002262731.1	agmatine deiminase	1.6678
SMU_654	WP_025985690.1	lantibiotic protection ABC transporter ATP-binding protein	1.6678
SMU_1055	WP_002262284.1	JAB domain-containing protein	1.66343
SMU_682	WP_002279797.1	hypothetical protein	1.65336
SMU_1128	WP_002262215.1	HAMP domain-containing histidine kinase	1.64702
SMU_500	WP_002263024.1	ribosome-associated translation inhibitor RaiA	1.64543
SMU_1088	WP_002262252.1	FAD:protein FMN transferase	1.63623
SMU_49	WP_002263388.1	ATP-grasp domain-containing protein	1.63296
SMU_1058	WP_002262282.1	DNA-binding protein	1.614
SMU_1692	WP_002262580.1	pyruvate formate lyase-activating protein	1.61176
SMU_1734	WP_002262542.1	acetyl-CoA carboxylase carboxyl transferase subunit alpha	1.61038
SMU_405c	WP_002262616.1	helix-turn-helix transcriptional regulator	1.61032
SMU_261c	WP_002262734.1	helix-turn-helix transcriptional regulator	1.60296
.	.	transfer-messenger RNA	1.5907
.	WP_002268367.1	type I toxin-antitoxin system Fst family toxin	1.5861
SMU_1415c	WP_002263555.1	TIGR01457 family HAD-type hydrolase	1.57759
SMU_1647c	WP_002262697.1	winged helix-turn-helix transcriptional regulator	1.57101
SMU_658	WP_002261883.1	membrane protein	1.56948
SMU_1612c	WP_002262778.1	class I SAM-dependent methyltransferase	1.56123
SMU_479	WP_002263044.1	DNA-directed RNA polymerase subunit omega	1.56031
SMU_1013c	WP_002263232.1	CitMHS family transporter	1.55901
SMU_1642c	WP_002262703.1	DUF421 domain-containing protein	1.55223
SMU_633	WP_002261908.1	prolyl oligopeptidase family serine peptidase	1.54639
SMU_1621c	WP_002262769.1	YozE family protein	1.53572
SMU_1798c	WP_002263508.1	HD domain-containing protein	1.53539
SMU_1958c	WP_002262152.1	PTS sugar transporter subunit IIC	1.53484
.	WP_002261953.1	DUF4044 domain-containing protein	1.52899
SMU_372	WP_002262477.1	hypothetical protein	1.52797
SMU_356	WP_002262493.1	pur operon repressor	1.52229
SMU_2164	WP_002262650.1	PDZ domain-containing protein	1.5194
SMU_1674	WP_002352351.1	pyridoxal phosphate-dependent aminotransferase	1.49971
SMU_1357	WP_002263282.1	hypothetical protein	1.49944
SMU_1745c	WP_002262531.1	MarR family transcriptional regulator	1.49552
SMU_209c	WP_002277748.1	YdcP family protein	1.49211
SMU_1934c	WP_002262130.1	ABC transporter ATP-binding protein	1.48991
SMU_1111c	WP_002262232.1	DUF1002 domain-containing protein	1.48541
SMU_1065c	WP_002262275.1	GntR family transcriptional regulator	1.48476
SMU_1073	WP_002262267.1	formate--tetrahydrofolate ligase	1.48127
SMU_1722c	WP_002262553.1	Bax inhibitor-1/YccA family protein	1.48036
SMU_1298	WP_012997715.1	type B 50S ribosomal protein L31	1.47996
SMU_29	WP_002263133.1	phosphoribosylaminoimidazolesuccinocarboxamide synthase	1.47661
SMU_134	WP_002263591.1	TetR/AcrR family transcriptional regulator	1.47512
SMU_1522	WP_002262934.1	amino acid ABC transporter permease	1.47148
SMU_115	WP_002263697.1	PTS transporter subunit EIIA	1.46926
SMU_2108c	WP_002352375.1	metalloregulator ArsR/SmtB family transcription factor	1.46104
SMU_2156	WP_002262456.1	DNA replication/repair protein RecF	1.45596
SMU_1854	WP_002262669.1	LytTR family transcriptional regulator	1.45512
SMU_781	WP_002261935.1	prephenate dehydrogenase	1.45297
SMU_1694c	WP_002262578.1	AI-2E family transporter	1.44898
SMU_01	WP_002262648.1	chromosomal replication initiator protein DnaA	1.44492
SMU_1603	WP_002262786.1	lactoylglutathione lyase	1.42942
.	WP_002263100.1	hypothetical protein	1.4178
SMU_2153c	WP_002352377.1	insulinase family protein	1.40624
SMU_2158c	WP_002262458.1	tryptophan--tRNA ligase	1.40458
SMU_1095	WP_002262245.1	ABC transporter permease/substrate-binding protein	1.4025
SMU_799c	WP_002261952.1	thioesterase family protein	1.40108
SMU_640c	WP_002261901.1	PLP-dependent aminotransferase family protein	1.40088
SMU_1048	WP_002262290.1	CYTH domain-containing protein	1.39712
SMU_1425	WP_002263115.1	AAA domain-containing protein	1.39507
SMU_1262c	WP_002263182.1	hypothetical protein	1.3915
SMU_2113c	WP_002262419.1	hypothetical protein	1.38838
SMU_1563	WP_002262972.1	cation-transporting P-type ATPase	1.38676
SMU_138	WP_002263595.1	malate permease	1.3846
SMU_747c	WP_002263631.1	permease	1.38254
SMU_1935c	WP_002262131.1	ECF-type riboflavin transporter substrate-binding protein	1.38067
SMU_1177c	WP_002262172.1	amino acid ABC transporter substrate-binding protein	1.37646
SMU_607	WP_002263243.1	TIGR02206 family membrane protein	1.3744
SMU_1064c	WP_002262276.1	GntR family transcriptional regulator	1.37301
SMU_1496	WP_002262463.1	galactose-6-phosphate isomerase subunit LacA	1.36938
SMU_1077	WP_002262263.1	phospho-sugar mutase	1.36503
.	WP_002263761.1	transposase	1.36099
SMU_1918	WP_002262115.1	cytochrome o ubiquinol oxidase	1.35708
SMU_112c	WP_002263694.1	MurR/RpiR family transcriptional regulator	1.35471
SMU_74	WP_002263410.1	histidine phosphatase family protein	1.35103
SMU_100	WP_002263578.1	PTS sugar transporter subunit IIB	1.35042
SMU_1495	WP_002262464.1	galactose-6-phosphate isomerase subunit LacB	1.3494
SMU_464	WP_002262097.1	nicotinate phosphoribosyltransferase	1.34045
SMU_1165c	WP_002262183.1	TetR/AcrR family transcriptional regulator	1.33933
SMU_613	WP_002263735.1	hypothetical protein	1.33368
SMU_1280c	WP_002263163.1	alpha/beta fold hydrolase	1.33155
SMU_1001	WP_002262865.1	DNA-protecting protein DprA	1.33031
SMU_1679c	WP_002262592.1	YbhB/YbcL family Raf kinase inhibitor-like protein	1.3297
SMU_1900	WP_002263739.1	HlyD family efflux transporter periplasmic adaptor subunit	1.32957
SMU_1219c	WP_002263275.1	MmcQ/YjbR family DNA-binding protein	1.32457
SMU_1403c	WP_002263547.1	CRISPR-associated endonuclease Cas2	1.31482
SMU_271	WP_002262726.1	PTS sugar transporter subunit IIB	1.30793
SMU_450	WP_002262086.1	glutamate-5-semialdehyde dehydrogenase	1.30779
SMU_1010	WP_002263235.1	[citrate (pro-3S)-lyase] ligase	1.30748
SMU_1172c	WP_002263837.1	cyclase family protein	1.3059
SMU_1791c	WP_002263513.1	nucleotidyltransferase	1.30531
SMU_960	WP_002262825.1	50S ribosomal protein L7/L12	1.27848
SMU_1996	WP_002352368.1	4-(cytidine 5'-diphospho)-2-C-methyl-D-erythritol kinase	1.27726
SMU_274	WP_002262723.1	L-ribulose-5-phosphate 3-epimerase	1.27192
SMU_1506c	WP_002265226.1	sodium transporter	1.2699
SMU_1995c	WP_002263427.1	MarR family transcriptional regulator	1.26551
SMU_925	WP_002267997.1	hypothetical protein	1.26505
SMU_1234	WP_002263209.1	ribose-5-phosphate isomerase RpiA	1.2647
SMU_780	WP_002261934.1	chorismate synthase	1.26085
SMU_1788c	WP_002263516.1	conjugal transfer protein TraF	1.25849
SMU_786	WP_002261940.1	prephenate dehydratase	1.25657
SMU_521	WP_002262041.1	DUF1027 domain-containing protein	1.25215
SMU_1284c	WP_002263161.1	NAD(P)H-binding protein	1.25012
SMU_1487	WP_002263061.1	cobalamin-independent methionine synthase II family protein	1.24603
SMU_1382	WP_002262706.1	3-isopropylmalate dehydratase large subunit	1.24091
SMU_456	WP_002262090.1	phospho-N-acetylmuramoyl-pentapeptide-transferase	1.23128
SMU_1291c	WP_002263155.1	chorismate mutase	1.23052
SMU_478	WP_002263045.1	guanylate kinase	1.21545
SMU_66	WP_002263404.1	membrane protein	1.20511
SMU_2093	WP_002262400.1	arginine repressor	1.20429
SMU_1148	WP_002262197.1	ABC transporter ATP-binding protein	1.20194
SMU_735	WP_002263461.1	hypothetical protein	1.20171
SMU_793	WP_002261947.1	PaaI family thioesterase	1.19662
SMU_384	WP_002262634.1	MarR family transcriptional regulator	1.19575
SMU_369c	WP_002268030.1	DNA-dependent RNA polymerase auxiliary subunit epsilon family protein	1.19558
SMU_1499	WP_002262919.1	helicase-exonuclease AddAB subunit AddA	1.19072
SMU_1166c	WP_002262182.1	FtsX-like permease family protein	1.189
SMU_1673	WP_002262598.1	uracil phosphoribosyltransferase	1.18713
SMU_1387	WP_002262710.1	Gfo/Idh/MocA family oxidoreductase	1.18492
SMU_1979c	WP_002263442.1	class I SAM-dependent methyltransferase	1.18057
SMU_48	WP_002263387.1	phosphoribosylamine--glycine ligase	1.18026
SMU_2107c	WP_011074690.1	hypothetical protein	1.17601
SMU_741	WP_002352238.1	DUF3114 domain-containing protein	1.17278
SMU_938	WP_002263657.1	phosphomevalonate kinase	1.17233
SMU_1967	WP_002263454.1	single-stranded DNA-binding protein	1.17088
SMU_1492	WP_002263056.1	PTS lactose/cellobiose transporter subunit IIA	1.16981
SMU_1968c	WP_002263453.1	rhodanese-like domain-containing protein	1.16821
SMU_1080c	WP_002262260.1	lysozyme family protein	1.16774
SMU_91	WP_002263425.1	trigger factor	1.16707
SMU_1041	WP_002262297.1	ABC transporter ATP-binding protein	1.16606
SMU_2114c	WP_002262420.1	MerR family transcriptional regulator	1.16467
SMU_1828	WP_002263469.1	universal stress protein	1.1578
SMU_292	WP_002310825.1	AraC family transcriptional regulator	1.15478
SMU_447	WP_002262083.1	DUF896 family protein	1.15107
SMU_71	WP_002263407.1	MATE family efflux transporter	1.14991
SMU_136c	WP_002267509.1	helix-turn-helix transcriptional regulator	1.14852
SMU_2152c	WP_002262452.1	helix-turn-helix domain-containing protein	1.14572
SMU_1947	WP_024781536.1	transcription termination/antitermination protein NusG	1.14097
SMU_1613c	WP_002310474.1	dephospho-CoA kinase	1.13641
SMU_987	WP_002262850.1	LPXTG cell wall anchor domain-containing protein	1.13185
SMU_564	WP_002263567.1	DUF1797 family protein	1.13181
SMU_626	WP_002261915.1	DNA internalization-related competence protein ComEC/Rec2	1.12627
SMU_1192	WP_002262159.1	DNA polymerase III subunit alpha	1.11341
SMU_952	WP_002262819.1	homocysteine S-methyltransferase	1.1134
SMU_422	WP_002262599.1	30S ribosome-binding factor RbfA	1.11317
SMU_1236c	WP_002263207.1	amidohydrolase family protein	1.09905
SMU_561c	WP_002263570.1	NUDIX hydrolase	1.09477
SMU_1712c	WP_002262562.1	segregation/condensation protein B	1.08992
SMU_1504c	WP_002262922.1	hypothetical protein	1.08729
SMU_835	WP_002261985.1	hypothetical protein	1.08582
SMU_939	WP_002263658.1	type 2 isopentenyl-diphosphate Delta-isomerase	1.08221
SMU_1725	WP_002262550.1	acylphosphatase	1.06822
SMU_30	WP_002263132.1	phosphoribosylformylglycinamidine synthase	1.06727
SMU_641	WP_002261900.1	alcohol dehydrogenase catalytic domain-containing protein	1.06355
SMU_1008	WP_002263237.1	response regulator transcription factor	1.06115
SMU_1773c	WP_011074663.1	SMEK domain-containing protein	1.04112
SMU_1500	WP_002262920.1	ATP-dependent nuclease subunit B	1.03919
SMU_404c	WP_002262617.1	hypothetical protein	1.03589
SMU_1081c	WP_002262259.1	nucleoid-associated protein	1.02655
SMU_1087	WP_002262253.1	4-oxalocrotonate tautomerase	1.02195
SMU_1916	WP_002262113.1	GHKL domain-containing protein	1.02143
SMU_948	WP_002262815.1	hypothetical protein	1.01842
SMU_980	WP_002262843.1	PTS transporter subunit EIIC	1.01735
SMU_1936c	WP_002262132.1	S-adenosyl-l-methionine hydroxide adenosyltransferase family protein	1.015
SMU_1011	WP_002263234.1	triphosphoribosyl-dephospho-CoA synthase CitG	1.01468
SMU_1809	WP_002263497.1	ABC transporter permease subunit	1.01151
SMU_527	WP_002262047.1	dihydrodipicolinate reductase	1.0104
SMU_24	WP_002263138.1	pyridoxal phosphate-dependent aminotransferase	1.00948
SMU_539c	WP_002279623.1	prepilin peptidase	1.00917
SMU_1218	WP_002263274.1	amidase	1.00679
Down regulated
SMU_1587c	WP_002352341.1	hypothetical protein	-1.00425
SMU_257	WP_002262738.1	ABC transporter permease	-1.0045
.	WP_002263011.1	hypothetical protein	-1.00634
SMU_273	WP_002262724.1	3-keto-L-gulonate-6-phosphate decarboxylase UlaD	-1.00687
SMU_449	WP_002262085.1	glutamate 5-kinase	-1.00909
SMU_648	WP_002261893.1	peptidylprolyl isomerase PrsA	-1.01058
.	WP_002262412.1	50S ribosomal protein L33	-1.01104
SMU_1420	WP_002263120.1	NAD(P)H-dependent oxidoreductase	-1.01159
SMU_528c	WP_002262048.1	antibiotic biosynthesis monooxygenase	-1.01554
SMU_113	WP_002263695.1	1-phosphofructokinase	-1.02125
SMU_184	WP_002262031.1	metal ABC transporter substrate-binding protein	-1.02135
SMU_293	WP_002263529.1	HXXEE domain-containing protein	-1.02772
SMU_1951c	WP_002262147.1	hypothetical protein	-1.0281
SMU_860	WP_002262009.1	carbamoyl-phosphate synthase large subunit	-1.02927
SMU_1412c	WP_002263553.1	ATP-binding cassette domain-containing protein	-1.03285
SMU_1303c	WP_002263143.1	C69 family dipeptidase	-1.03619
SMU_831	WP_002261981.1	LTA synthase family protein	-1.03978
SMU_1671c	WP_002262673.1	YlbF family regulator	-1.04269
.	WP_002263298.1	AbrB/MazE/SpoVT family DNA-binding domain-containing protein	-1.05056
SMU_183	WP_002262030.1	metal ABC transporter permease	-1.05174
SMU_1531	WP_002262943.1	F0F1 ATP synthase subunit delta	-1.05265
SMU_1665	WP_002262679.1	ABC transporter ATP-binding protein	-1.06096
SMU_795	WP_002264782.1	acyl-CoA thioesterase	-1.06792
SMU_1645	WP_002262699.1	SAM-dependent methyltransferase TehB	-1.06922
SMU_342	WP_002279639.1	ribonuclease M5	-1.06977
SMU_270	WP_002262727.1	PTS ascorbate transporter subunit IIC	-1.07791
SMU_1003	WP_002262867.1	methylenetetrahydrofolate--tRNA-(uracil(54)-C(5))-methyltransferase (FADH(2)-oxidizing) TrmFO	-1.07818
SMU_673	WP_002352228.1	putative ABC transporter permease	-1.08645
SMU_1672	WP_002262672.1	ATP-dependent Clp protease proteolytic subunit	-1.09214
SMU_789	WP_002261943.1	CPBP family intramembrane metalloprotease	-1.09464
SMU_1869	WP_002263363.1	thioredoxin	-1.09693
SMU_2112	WP_002262418.1	glucan-binding protein A, GbpA	-1.09824
SMU_665	WP_002261876.1	acetylglutamate kinase	-1.09958
SMU_660	WP_002261881.1	HAMP domain-containing histidine kinase	-1.1014
SMU_712	WP_002263316.1	phosphoenolpyruvate carboxylase	-1.10306
SMU_891	WP_002262884.1	type I restriction-modification system subunit M	-1.10351
SMU_1286c	WP_002263160.1	MFS transporter	-1.10499
SMU_796	WP_002261950.1	SDR family oxidoreductase	-1.1077
SMU_1606	WP_002262783.1	SsrA-binding protein SmpB	-1.10888
SMU_346	WP_002267310.1	nitroreductase family protein	-1.11122
SMU_1989	WP_002263433.1	DNA-directed RNA polymerase subunit beta'	-1.1113
SMU_1889c	WP_002352361.1	ComC/BlpC family leader-containing pheromone/bacteriocin	-1.11943
SMU_t34	.	tRNA-Ser	-1.12082
SMU_906	WP_002262898.1	ABC transporter ATP-binding protein	-1.12473
SMU_610	WP_002352221.1	cell surface antigen I/II	-1.12833
SMU_1005	WP_002352269.1	glucosyltransferase-SI	-1.12914
SMU_1171c	WP_002262177.1	HAD-IIB family hydrolase	-1.13176
SMU_t52	.	tRNA-Gly	-1.13262
SMU_625	WP_002261916.1	competence protein	-1.13725
SMU_83	WP_002263418.1	molecular chaperone DnaJ	-1.1401
SMU_1373c	WP_002263640.1	helix-turn-helix domain-containing protein	-1.1451
SMU_1150	WP_002262195.1	ABC transporter permease subunit	-1.1495
SMU_1118c	WP_002262225.1	ABC transporter permease	-1.15581
SMU_2161c	WP_002262652.1	DUF1275 domain-containing protein	-1.1582
SMU_1189c	WP_002310292.1	GlsB/YeaQ/YmgE family stress response membrane protein	-1.16301
SMU_1834	WP_002263464.1	alanine racemase	-1.16776
SMU_1688	WP_002262585.1	D-alanyl-lipoteichoic acid biosynthesis protein DltD	-1.1698
SMU_690	WP_002263334.1	hypothetical protein	-1.17088
SMU_1163c	WP_002262185.1	ABC transporter ATP-binding protein	-1.17186
SMU_301	WP_002262916.1	nucleotidyltransferase family protein	-1.17786
SMU_590c	WP_011074531.1	IS3 family transposase	-1.18108
SMU_295	WP_002263531.1	hypothetical protein	-1.18274
SMU_1072c	WP_002262268.1	N-acetyltransferase	-1.18303
SMU_114	WP_002263696.1	PTS transporter subunit EIIC	-1.18531
SMU_2065	WP_002279589.1	UDP-glucose 4-epimerase GalE	-1.19615
SMU_874	WP_002262022.1	bifunctional homocysteine S-methyltransferase/methylenetetrahydrofolate reductase	-1.19668
SMU_1096	WP_002262244.1	ABC transporter ATP-binding protein	-1.19736
SMU_525	WP_002279621.1	ABC transporter ATP-binding protein	-1.20081
SMU_1076	WP_002262264.1	ECF transporter S component	-1.20175
SMU_1513	WP_002262926.1	chromosome segregation protein SMC	-1.20426
SMU_834	WP_002261984.1	glycosyltransferase	-1.20441
SMU_1493	WP_002277661.1	tagatose-bisphosphate aldolase	-1.2072
SMU_669c	WP_002261872.1	redoxin NrdH	-1.21225
SMU_259	WP_002262736.1	ABC transporter ATP-binding protein	-1.21353
SMU_965	WP_002262829.1	homoserine dehydrogenase	-1.2136
SMU_1288	WP_002263158.1	50S ribosomal protein L19	-1.22281
SMU_1170	WP_002262178.1	cytochrome c biogenesis protein CcdA	-1.22432
SMU_1032	WP_002262305.1	tyrosine-type recombinase/integrase	-1.22684
SMU_1086	WP_002262254.1	thymidine kinase	-1.22786
SMU_709	WP_002263318.1	ECF transporter S component	-1.23096
SMU_2070	WP_002262377.1	peroxide stress protein YaaA	-1.23223
SMU_1925c	WP_002262122.1	hypothetical protein	-1.23281
SMU_1449	WP_002263095.1	fibronectin/fibrinogen-binding protein	-1.23457
SMU_664	WP_002261877.1	bifunctional ornithine acetyltransferase/N-acetylglutamate synthase	-1.24726
SMU_872	WP_002262020.1	PTS transporter subunit EIIA	-1.24829
SMU_1139c	WP_002262205.1	methylase	-1.2553
SMU_1521	WP_002262933.1	amino acid ABC transporter permease	-1.26256
SMU_909	WP_002262899.1	permease	-1.26391
SMU_643	WP_002261898.1	alpha/beta hydrolase	-1.26551
SMU_265	WP_002262730.1	carbamate kinase	-1.2668
SMU_1841	WP_002262657.1	PTS beta-glucoside transporter subunit IIBCA	-1.27786
SMU_26	WP_002263136.1	phosphate acyltransferase PlsX	-1.27884
SMU_1520	WP_002262932.1	transporter substrate-binding domain-containing protein	-1.279
SMU_794	WP_002261948.1	hypothetical protein	-1.28142
SMU_1149	WP_002262196.1	ABC transporter permease subunit	-1.28377
SMU_1222	WP_002263220.1	orotidine-5'-phosphate decarboxylase	-1.28447
SMU_1085	WP_002262255.1	peptide chain release factor 1	-1.28807
SMU_302	WP_002262915.1	YdcF family protein	-1.29291
SMU_1657c	WP_002262687.1	P-II family nitrogen regulator	-1.30499
SMU_755	WP_002263626.1	prolipoprotein diacylglyceryl transferase	-1.3074
SMU_1862	WP_002263366.1	hypothetical protein	-1.3094
SMU_1060	WP_002262280.1	signal recognition particle protein	-1.31012
SMU_355	WP_002262494.1	HD domain-containing protein	-1.31062
SMU_820	WP_002261970.1	hypothetical protein	-1.31196
SMU_1655c	WP_002262689.1	hypothetical protein	-1.31337
SMU_836	WP_002261986.1	CHAP domain-containing protein	-1.3136
SMU_629	WP_002261912.1	superoxide dismutase	-1.31474
SMU_700c	WP_002263325.1	histidine phosphatase family protein	-1.32045
SMU_2116	WP_002262422.1	betaine/proline/choline family ABC transporter ATP-binding protein	-1.32154
SMU_1735	WP_002280638.1	acetyl-CoA carboxylase carboxyltransferase subunit beta	-1.32443
SMU_248	WP_002262746.1	Fe-S cluster assembly protein SufD	-1.32763
SMU_182	WP_002262029.1	metal ABC transporter ATP-binding protein	-1.32797
SMU_1738	WP_002279632.1	acetyl-CoA carboxylase biotin carboxyl carrier protein	-1.33356
SMU_1994	WP_002263428.1	metal ABC transporter ATP-binding protein	-1.33381
SMU_1204	WP_002352284.1	DNA topoisomerase IV subunit A	-1.34414
SMU_1321c	WP_002263541.1	ATP-grasp domain-containing protein	-1.34542
SMU_1178c	WP_002262171.1	amino acid ABC transporter ATP-binding protein	-1.34696
SMU_412c	WP_002262609.1	HIT family protein	-1.34749
SMU_236c	WP_002262757.1	TetR/AcrR family transcriptional regulator	-1.34858
SMU_1794c	WP_002263511.1	hypothetical protein	-1.34866
SMU_1867c	WP_002263364.1	zinc-dependent alcohol dehydrogenase family protein	-1.36089
SMU_1079c	WP_002352279.1	ABC transporter ATP-binding protein	-1.36107
SMU_1002	WP_002262866.1	type I DNA topoisomerase	-1.36146
SMU_1167c	WP_002262181.1	ABC transporter ATP-binding protein	-1.36183
SMU_360	WP_002262489.1	type I glyceraldehyde-3-phosphate dehydrogenase	-1.37213
SMU_233	WP_002262760.1	ketol-acid reductoisomerase	-1.37229
SMU_81	WP_002263416.1	nucleotide exchange factor GrpE	-1.37753
SMU_716	WP_002263312.1	aminoacyltransferase	-1.37838
SMU_160	WP_002263002.1	DUF2268 domain-containing protein	-1.37849
SMU_1607	WP_002262782.1	ribonuclease R	-1.37999
SMU_370	WP_002262479.1	ABC transporter ATP-binding protein	-1.38293
SMU_64	WP_002263402.1	Holliday junction branch migration DNA helicase RuvB	-1.38322
SMU_409	WP_002272923.1	tRNA (adenosine(37)-N6)-threonylcarbamoyltransferase complex ATPase subunit type 1 TsaE	-1.38422
SMU_365	WP_002279635.1	glutamate synthase large subunit	-1.38581
SMU_991	WP_002262855.1	hypothetical protein	-1.38792
SMU_1137	WP_002262207.1	phosphate ABC transporter permease subunit PstC	-1.39049
SMU_1486c	WP_002263062.1	hypothetical protein	-1.39082
SMU_976	WP_002262840.1	ABC transporter substrate-binding protein	-1.3919
SMU_1472	WP_002263074.1	single-stranded-DNA-specific exonuclease RecJ	-1.39253
SMU_666	WP_002261875.1	acetylornithine transaminase	-1.39364
SMU_951	WP_002262818.1	amino acid permease	-1.3945
SMU_1007	WP_002263238.1	ABC transporter permease	-1.39474
SMU_830	WP_002261980.1	alpha-L-Rha alpha-1,3-L-rhamnosyltransferase	-1.39499
SMU_1560	WP_002262969.1	EamA family transporter	-1.39679
SMU_723	WP_002352235.1	cation-translocating P-type ATPase	-1.39692
SMU_1973	WP_002263448.1	glutamyl aminopeptidase	-1.39979
SMU_873	WP_002262021.1	5-methyltetrahydropteroyltriglutamate--homocysteine S-methyltransferase	-1.40012
SMU_462	WP_002262095.1	DUF4059 family protein	-1.40143
SMU_1105c	WP_002262237.1	histidine phosphatase family protein	-1.40316
SMU_363	WP_002262486.1	MerR family transcriptional regulator	-1.40879
SMU_366	WP_002262483.1	glutamate synthase subunit beta	-1.40968
SMU_333	WP_002262514.1	hypothetical protein	-1.41009
SMU_70	WP_002263406.1	threonine synthase	-1.41096
SMU_618	WP_002263746.1	hypothetical protein	-1.41102
SMU_1098c	WP_002262242.1	zinc-binding dehydrogenase	-1.41178
SMU_1965c	WP_002263456.1	sensor histidine kinase	-1.41617
SMU_888	WP_002262881.1	UDP-glucose 4-epimerase GalE	-1.42199
SMU_2066c	WP_002279588.1	YfhO family protein	-1.42383
SMU_335	WP_002262512.1	argininosuccinate lyase	-1.42426
SMU_1273	WP_002263171.1	histidinol-phosphate transaminase	-1.42528
SMU_1533	WP_002262945.1	F0F1 ATP synthase subunit A	-1.42667
SMU_1954	WP_002262148.1	chaperonin GroEL	-1.42694
SMU_1856c	WP_002262671.1	hypothetical protein	-1.44067
SMU_1831	WP_002263467.1	asparaginase	-1.4413
SMU_1349	WP_002266732.1	mutanobactin A biosynthesis transcriptional regulator MubR	-1.44622
SMU_1173	WP_002262176.1	O-acetylhomoserine aminocarboxypropyltransferase/cysteine synthase	-1.44755
SMU_1548c	WP_002262959.1	sensor histidine kinase	-1.44895
SMU_1450	WP_002263094.1	amino acid permease	-1.44959
SMU_1611c	WP_002262779.1	multidrug efflux MFS transporter	-1.45057
SMU_t20	.	tRNA-Thr	-1.45486
SMU_2111c	WP_002262417.1	hypothetical protein	-1.45534
SMU_1386	WP_002262709.1	uridine kinase	-1.45624
SMU_159	WP_002263003.1	Mini-ribonuclease 3	-1.45819
SMU_632	WP_002261909.1	MarR family transcriptional regulator	-1.45829
SMU_1602	WP_002262787.1	NAD(P)H-dependent oxidoreductase	-1.46028
SMU_1966c	WP_002263455.1	sugar ABC transporter substrate-binding protein	-1.46201
SMU_1083c	WP_002262257.1	threonylcarbamoyl-AMP synthase	-1.47201
SMU_417	WP_002262604.1	ribosome maturation factor RimP	-1.47202
SMU_438c	WP_002352208.1	2-hydroxyacyl-CoA dehydratase	-1.4723
SMU_2067	WP_002264558.1	glycosyltransferase family 2 protein	-1.47403
SMU_1988c	WP_002263434.1	DUF1033 family protein	-1.47763
SMU_2157	WP_002262457.1	IMP dehydrogenase	-1.47894
SMU_671	WP_002261870.1	citrate synthase	-1.479
SMU_1517	WP_002262930.1	response regulator transcription factor	-1.4791
SMU_1185	WP_002262165.1	PTS mannitol transporter subunit IICBA	-1.48011
SMU_2121c	WP_002262427.1	hypothetical protein	-1.481
SMU_1187	WP_002262164.1	glutamine--fructose-6-phosphate transaminase (isomerizing)	-1.48244
SMU_554	WP_002262071.1	cell division protein SepF	-1.48492
SMU_383c	WP_002262467.1	SDR family oxidoreductase	-1.48509
SMU_1216c	WP_002263272.1	amino acid ABC transporter permease	-1.48539
SMU_585	WP_002262103.1	DNA repair protein RecN	-1.49304
SMU_1319c	WP_002263542.1	esterase family protein	-1.49333
SMU_890	WP_002262883.1	phosphatase PAP2 family protein	-1.49778
SMU_85	WP_002263420.1	bifunctional hydroxymethylpyrimidine kinase/phosphomethylpyrimidine kinase	-1.49832
SMU_2115	WP_002263787.1	SDR family NAD(P)-dependent oxidoreductase	-1.50595
.	WP_002262852.1	aspartate-semialdehyde dehydrogenase leader peptide	-1.5088
SMU_84	WP_002263419.1	tRNA pseudouridine(38-40) synthase TruA	-1.51272
SMU_1006	WP_002263239.1	ABC transporter ATP-binding protein	-1.51354
SMU_644	WP_002261897.1	competence protein CoiA	-1.51505
SMU_596	WP_002263252.1	phosphoglycerate mutase	-1.51864
SMU_905	WP_002262897.1	ABC transporter ATP-binding protein	-1.52154
SMU_674	WP_002262984.1	phosphocarrier protein HPr	-1.52441
SMU_624	WP_002261917.1	1-acyl-sn-glycerol-3-phosphate acyltransferase	-1.52481
SMU_2044	WP_002262356.1	bifunctional (p)ppGpp synthetase/guanosine-3',5'-bis(diphosphate) 3'-pyrophosphohydrolase	-1.52488
SMU_701c	WP_002263324.1	YccF domain-containing protein	-1.52498
SMU_1179c	WP_002262170.1	amino acid ABC transporter permease	-1.52502
.	WP_002310166.1	hypothetical protein	-1.5261
SMU_803c	WP_002261956.1	ABC-F family ATP-binding cassette domain-containing protein	-1.5269
SMU_992	WP_002262856.1	hypothetical protein	-1.52822
SMU_1174	WP_002262175.1	DNA helicase PcrA	-1.53047
SMU_498	WP_002263026.1	DEAD/DEAH box helicase	-1.53249
SMU_1467	WP_002263078.1	adenine phosphoribosyltransferase	-1.53438
SMU_672	WP_002261869.1	NADP-dependent isocitrate dehydrogenase	-1.54352
SMU_474	WP_002263047.1	S-ribosylhomocysteine lyase	-1.54362
SMU_1494	WP_002262465.1	tagatose-6-phosphate kinase	-1.55409
.	WP_086956939.1	IS3-like element ISSmu1 family transposase	-1.55611
SMU_118c	WP_002263487.1	S-formylglutathione hydrolase	-1.55628
SMU_121	WP_002263484.1	MATE family efflux transporter	-1.55659
SMU_247	WP_002262747.1	Fe-S cluster assembly ATPase SufC	-1.5594
SMU_382c	WP_032497566.1	aldo/keto reductase	-1.55965
SMU_348	WP_002267309.1	HIT family protein	-1.56045
SMU_670	WP_002261871.1	aconitate hydratase AcnA	-1.56605
.	.	signal recognition particle sRNA small type	-1.56791
SMU_1078c	WP_002262262.1	ABC transporter ATP-binding protein	-1.56874
SMU_1632	WP_002263611.1	5'-methylthioadenosine/adenosylhomocysteine nucleosidase	-1.56937
SMU_1547c	WP_002262958.1	response regulator transcription factor	-1.56971
SMU_296	WP_002263532.1	2-dehydropantoate 2-reductase	-1.57068
SMU_898	WP_002262891.1	DUF1149 family protein	-1.57485
SMU_1586	WP_002262802.1	threonine--tRNA ligase	-1.57551
SMU_2126c	WP_002263785.1	nucleoside phosphorylase	-1.57732
SMU_455	WP_002262089.1	penicillin-binding protein	-1.57916
SMU_82	WP_002263417.1	molecular chaperone DnaK	-1.58094
SMU_973	WP_002262837.1	ABC transporter ATP-binding protein	-1.59319
SMU_1424	WP_002263116.1	dihydrolipoyl dehydrogenase	-1.59598
SMU_343	WP_002279256.1	isoprenylcysteine carboxylmethyltransferase family protein	-1.59828
SMU_1075	WP_002262265.1	phosphopantothenoylcysteine decarboxylase	-1.6058
SMU_1247	WP_002263196.1	phosphopyruvate hydratase	-1.6089
SMU_1928	WP_002263841.1	FtsX-like permease family protein	-1.60968
SMU_99	WP_002263577.1	fructose-bisphosphate aldolase	-1.61121
SMU_2009	WP_002262323.1	30S ribosomal protein S5	-1.61414
SMU_272	WP_002262725.1	PTS transporter subunit EIIA	-1.61426
SMU_2147c	WP_002262447.1	LysM peptidoglycan-binding domain-containing protein	-1.61453
SMU_284	WP_002263726.1	hypothetical protein	-1.61796
SMU_231	WP_002262762.1	acetolactate synthase large subunit	-1.61975
SMU_161	WP_002263001.1	MerR family transcriptional regulator	-1.62231
SMU_187c	WP_002262033.1	tRNA dihydrouridine synthase DusB	-1.62621
SMU_1687	WP_002262586.1	manganese-dependent inorganic pyrophosphatase	-1.62665
SMU_350	WP_002267307.1	hypothetical protein	-1.62732
SMU_1109c	WP_002262233.1	divalent metal cation transporter	-1.62798
SMU_1243	WP_002263199.1	low temperature requirement A protein	-1.63028
SMU_14	WP_002262637.1	hypoxanthine phosphoribosyltransferase	-1.63159
SMU_341	WP_002270342.1	TatD family hydrolase	-1.6329
SMU_2030	WP_002262345.1	CtsR family transcriptional regulator	-1.63487
SMU_531	WP_011074524.1	chorismate mutase	-1.63584
SMU_543	WP_002262062.1	rhodanese-like domain-containing protein	-1.63986
SMU_2133c	WP_002262435.1	YhgE/Pip domain-containing protein	-1.64058
SMU_445	WP_002262081.1	glycine--tRNA ligase subunit alpha	-1.64191
SMU_258	WP_002262737.1	ABC transporter ATP-binding protein	-1.64317
SMU_403	WP_002262618.1	DNA polymerase IV	-1.65655
SMU_1169c	WP_002262179.1	redoxin family protein	-1.65725
SMU_16	WP_002263780.1	amino acid permease	-1.65737
SMU_957	WP_002262824.1	50S ribosomal protein L10	-1.65991
SMU_1084	WP_002262256.1	peptide chain release factor N(5)-glutamine methyltransferase	-1.66161
SMU_734	WP_002310164.1	hypothetical protein	-1.66269
SMU_1920	WP_002262117.1	ribosome biogenesis GTPase Der	-1.66564
SMU_838	WP_002261988.1	glutathione-disulfide reductase	-1.67017
SMU_1207	WP_002263264.1	cell division protein Fic	-1.67645
SMU_832	WP_011074554.1	hypothetical protein	-1.68821
SMU_1605	WP_002262784.1	DHA2 family efflux MFS transporter permease subunit	-1.68995
SMU_1677	WP_002262594.1	UDP-N-acetylmuramoyl-L-alanyl-D-glutamate--L-lysine ligase	-1.69071
SMU_1875	WP_002263357.1	ATP-dependent RecD-like DNA helicase	-1.69449
SMU_1341c	WP_002267530.1	mutanobactin A non-ribosomal peptide synthetase MubB	-1.69656
SMU_1344c	WP_011074617.1	mutanobactin A biosynthesis transacylase MubG	-1.70492
SMU_262	WP_002282737.1	putrescine carbamoyltransferase	-1.70693
SMU_1445c	WP_002263098.1	ABC transporter ATP-binding protein	-1.70722
SMU_408	WP_002262613.1	NCS2 family permease	-1.71575
SMU_993	WP_002262857.1	ribosome biogenesis GTPase YlqF	-1.71581
SMU_848	WP_002261997.1	ribosomal-processing cysteine protease Prp	-1.71615
SMU_788	WP_002261942.1	23S rRNA (uracil(1939)-C(5))-methyltransferase RlmD	-1.71674
SMU_1626	WP_002352344.1	50S ribosomal protein L1	-1.71976
SMU_143c	WP_002263599.1	peptide deformylase	-1.7255
SMU_942	WP_011074567.1	hydroxymethylglutaryl-CoA reductase, degradative	-1.73017
SMU_1917	WP_002262114.1	response regulator transcription factor	-1.73066
SMU_1667	WP_002262677.1	branched-chain amino acid ABC transporter permease	-1.73585
SMU_2010	WP_002262324.1	50S ribosomal protein L18	-1.73706
SMU_1421	WP_002263119.1	2-oxo acid dehydrogenase subunit E2	-1.7375
SMU_157	WP_002263005.1	serine O-acetyltransferase	-1.73896
SMU_1658	WP_002262686.1	ammonium transporter	-1.74457
SMU_1423	WP_002263117.1	thiamine pyrophosphate-dependent dehydrogenase E1 component subunit alpha	-1.74616
SMU_522	WP_002262042.1	23S rRNA (adenine(2503)-C(2))-methyltransferase RlmN	-1.7531
SMU_344	WP_080007635.1	DUF1697 domain-containing protein	-1.75385
SMU_232	WP_002262761.1	acetolactate synthase small subunit	-1.75971
SMU_563	WP_002263568.1	ornithine carbamoyltransferase	-1.76185
SMU_1532	WP_002262944.1	F0F1 ATP synthase subunit B	-1.76503
SMU_1847	WP_002262662.1	elongation factor P	-1.76668
SMU_572	WP_002263561.1	bifunctional methylenetetrahydrofolate dehydrogenase/methenyltetrahydrofolate cyclohydrolase	-1.77023
SMU_426	WP_002263707.1	copper-translocating P-type ATPase	-1.77406
SMU_2046c	WP_002262357.1	endonuclease/exonuclease/phosphatase family protein	-1.78101
SMU_940c	WP_002263659.1	hemolysin III family protein	-1.78138
SMU_2101	WP_002262408.1	aspartate--tRNA ligase	-1.78389
SMU_663	WP_002261878.1	N-acetyl-gamma-glutamyl-phosphate reductase	-1.79129
SMU_1663	WP_002262681.1	dTMP kinase	-1.7935
SMU_2000	WP_002262314.1	50S ribosomal protein L17	-1.79475
SMU_1877	WP_002263355.1	PTS mannose transporter subunit IIAB	-1.79816
SMU_1919	WP_002262116.1	hypothetical protein	-1.80078
SMU_263	WP_002262732.1	APC family permease	-1.80893
SMU_1512	WP_002262925.1	phenylalanine--tRNA ligase subunit alpha	-1.81641
SMU_1550c	WP_002262960.1	ABC transporter permease	-1.82156
SMU_639	WP_002261902.1	GNAT family N-acetyltransferase	-1.82381
SMU_1731	WP_002262545.1	UDP-N-acetylmuramate--L-alanine ligase	-1.82911
SMU_968	WP_002262832.1	GTP cyclohydrolase I FolE	-1.83047
SMU_699	WP_002263326.1	50S ribosomal protein L20	-1.83478
SMU_241c	WP_002310810.1	amino acid ABC transporter ATP-binding protein	-1.84035
SMU_1208c	WP_002352285.1	hypothetical protein	-1.84086
SMU_228	WP_002262764.1	Asp23/Gls24 family envelope stress response protein	-1.84108
SMU_1926	WP_002262123.1	TetR/AcrR family transcriptional regulator	-1.84422
SMU_611	WP_002263748.1	DEAD/DEAH box helicase	-1.8451
SMU_322c	WP_002262524.1	UTP--glucose-1-phosphate uridylyltransferase GalU	-1.84566
SMU_416	WP_002262605.1	tRNA (guanosine(46)-N7)-methyltransferase TrmB	-1.846
SMU_467	WP_002263053.1	PBP1A family penicillin-binding protein	-1.85148
SMU_1853	WP_002262668.1	DUF1129 domain-containing protein	-1.85406
SMU_649	WP_002261892.1	hypothetical protein	-1.85798
SMU_407	WP_002262614.1	DUF1361 domain-containing protein	-1.86766
SMU_1091	WP_002262249.1	LPXTG cell wall anchor domain-containing protein	-1.87785
SMU_1082	WP_002262258.1	serine hydroxymethyltransferase	-1.87949
SMU_698	WP_002263327.1	50S ribosomal protein L35	-1.8796
SMU_524	WP_002262044.1	ATP-binding cassette domain-containing protein	-1.88372
SMU_t51	.	tRNA-Thr	-1.89197
SMU_1881c	WP_002263352.1	peptide cleavage/export ABC transporter	-1.89264
SMU_1422	WP_002263118.1	alpha-ketoacid dehydrogenase subunit beta	-1.8947
SMU_1666	WP_002262678.1	ABC transporter ATP-binding protein	-1.90146
SMU_2135c	WP_002262437.1	30S ribosomal protein S4	-1.91236
SMU_1884c	WP_002263349.1	acyltransferase	-1.91836
SMU_1927	WP_002262124.1	ABC transporter ATP-binding protein	-1.92733
SMU_328	WP_002262519.1	carbonic anhydrase	-1.94018
SMU_133c	WP_002263590.1	MFS transporter	-1.95523
SMU_1649	WP_002262695.1	exodeoxyribonuclease III	-1.95907
SMU_1946	WP_002262141.1	DUF4956 domain-containing protein	-1.95949
SMU_415	WP_002262606.1	phosphotransferase family protein	-1.97155
SMU_144c	WP_002263600.1	cyclic nucleotide-binding domain-containing protein	-1.97604
SMU_t40	.	tRNA-Arg	-1.98186
SMU_22	WP_002263140.1	CHAP domain-containing protein	-1.98225
SMU_349	WP_002279637.1	16S rRNA (adenine(1518)-N(6)/adenine(1519)-N(6))-dimethyltransferase RsmA	-1.98436
SMU_256	WP_002262739.1	ABC transporter permease	-1.98514
SMU_1656	WP_002262688.1	3-phosphoserine/phosphohydroxythreonine transaminase	-1.98585
SMU_1342	WP_002267529.1	non-ribosomal peptide synthetase	-1.98689
SMU_689	WP_002263335.1	autolysin	-1.98985
SMU_1119c	WP_002262224.1	ABC transporter permease	-1.9905
SMU_875c	WP_161601736.1	IS3 family transposase	-2.00116
SMU_944	WP_002263663.1	thymidylate synthase	-2.00116
SMU_720	WP_002263308.1	sulfite exporter TauE/SafE family protein	-2.01134
SMU_1297	WP_002263149.1	bifunctional oligoribonuclease/PAP phosphatase NrnA	-2.02836
SMU_706c	WP_002263320.1	energy-coupled thiamine transporter ThiT	-2.03585
SMU_1827	WP_002263470.1	biotin transporter BioY	-2.03845
SMU_806c	WP_002352242.1	ABC transporter permease subunit	-2.04596
SMU_2102	WP_002352373.1	histidine--tRNA ligase	-2.04833
SMU_865	WP_002262013.1	30S ribosomal protein S16	-2.06281
.	WP_002309971.1	hypothetical protein	-2.06779
SMU_1438c	WP_002263103.1	matrixin family metalloprotease	-2.0756
SMU_1566	WP_002262975.1	LacI family transcriptional regulator	-2.07603
SMU_1727	WP_002262549.1	membrane protein insertase YidC2	-2.08407
SMU_418	WP_002262603.1	transcription termination/antitermination protein NusA	-2.08836
SMU_169	WP_002262993.1	50S ribosomal protein L13	-2.10366
SMU_707c	WP_002263319.1	N-acetylmuramoyl-L-alanine amidase	-2.10384
SMU_t19	.	tRNA-Leu	-2.10592
SMU_1343c	WP_002267528.1	mutanobactin A polyketide synthase MubH	-2.12088
SMU_1062	WP_002262278.1	ABC transporter permease/substrate binding protein	-2.12447
SMU_1063	WP_002262277.1	glycine betaine/L-proline ABC transporter ATP-binding protein	-2.12451
SMU_2167	WP_011074682.1	50S ribosomal protein L2	-2.13247
SMU_1627	WP_002263607.1	50S ribosomal protein L11	-2.13261
SMU_1929	WP_002262126.1	zinc metalloprotease HtpX	-2.13285
SMU_1771c	WP_002263674.1	nucleotidyltransferase	-2.14985
SMU_805c	WP_002261958.1	amino acid ABC transporter ATP-binding protein	-2.15463
SMU_1668	WP_002262676.1	branched-chain amino acid ABC transporter permease	-2.17014
SMU_2025	WP_002262340.1	50S ribosomal protein L3	-2.20485
SMU_t65	.	tRNA-Arg	-2.2075
SMU_924	WP_002263295.1	thiol peroxidase	-2.20982
SMU_714	WP_002263314.1	elongation factor Tu	-2.21292
SMU_1203	WP_080007640.1	branched-chain amino acid aminotransferase	-2.22264
SMU_2146c	WP_002262446.1	transglycosylase SLT domain-containing protein	-2.23832
SMU_188c	WP_002262034.1	Hsp33 family molecular chaperone HslO	-2.24058
SMU_737	WP_002263462.1	alpha/beta hydrolase	-2.2436
SMU_1865	WP_002263365.1	A/G-specific adenine glycosylase	-2.24625
SMU_523	WP_002262043.1	VanZ family protein	-2.25311
SMU_1699c	WP_002262575.1	TIGR01212 family radical SAM protein	-2.26206
SMU_424	WP_002263708.1	CopY/TcrY family copper transport repressor	-2.2698
SMU_638	WP_002261903.1	rRNA pseudouridine synthase	-2.27295
SMU_260	WP_002262735.1	nitroreductase family protein	-2.27638
SMU_1175	WP_002262174.1	sodium:alanine symporter family protein	-2.27666
SMU_668c	WP_002261873.1	class 1b ribonucleoside-diphosphate reductase subunit alpha	-2.27982
SMU_358	WP_002262491.1	30S ribosomal protein S7	-2.30064
SMU_1639	WP_002263617.1	methionine--tRNA ligase	-2.3069
SMU_954	WP_002262821.1	pyridoxamine kinase	-2.33963
SMU_955	WP_002262822.1	membrane protein	-2.34807
SMU_2166	WP_002262338.1	50S ribosomal protein L23	-2.34868
SMU_1815	WP_002263491.1	response regulator transcription factor	-2.35339
SMU_1432c	WP_002263108.1	endoglucanase	-2.36112
SMU_667	WP_002261874.1	class 1b ribonucleoside-diphosphate reductase subunit beta	-2.36116
SMU_512c	WP_019313106.1	hypothetical protein	-2.41254
SMU_2020	WP_002262333.1	50S ribosomal protein L16	-2.41824
SMU_1930	WP_002262127.1	LemA family protein	-2.42572
SMU_994	WP_002262858.1	ribonuclease HII	-2.42903
SMU_2008	WP_002262322.1	50S ribosomal protein L30	-2.42994
SMU_2014	WP_002262327.1	type Z 30S ribosomal protein S14	-2.43471
SMU_t36	.	tRNA-Ser	-2.4619
SMU_132	WP_002263589.1	amidohydrolase	-2.47812
SMU_1516	WP_002262929.1	cell wall metabolism sensor histidine kinase VicK	-2.48476
SMU_1434c	WP_019318890.1	glycosyltransferase family 2 protein	-2.50655
SMU_1322	WP_002263540.1	(S)-acetoin forming diacetyl reductase	-2.52108
SMU_1852	WP_002262667.1	magnesium transporter CorA family protein	-2.52476
SMU_2104	WP_002262410.1	APC family permease	-2.53143
SMU_2022	WP_002262335.1	50S ribosomal protein L22	-2.53218
SMU_1721c	WP_002262554.1	diaminopimelate decarboxylase	-2.5339
SMU_76	WP_002263412.1	N-acetylmuramidase	-2.54765
SMU_2109	WP_002262416.1	multidrug efflux MFS transporter MdeA	-2.55769
SMU_562	WP_002263569.1	ATP-dependent Clp protease ATP-binding subunit	-2.56429
SMU_2015	WP_002262328.1	50S ribosomal protein L5	-2.57911
SMU_1390	WP_002262713.1	hypothetical protein	-2.61782
SMU_237c	WP_002262756.1	ABC transporter permease	-2.62179
SMU_2021	WP_002262334.1	30S ribosomal protein S3	-2.64043
SMU_80	WP_002263415.1	heat-inducible transcriptional repressor HrcA	-2.66185
.	WP_002262341.1	30S ribosomal protein S10	-2.68267
SMU_t37	.	tRNA-Arg	-2.68359
SMU_1436c	WP_002263105.1	hypothetical protein	-2.68749
SMU_1296	WP_002263150.1	glutathione-dependent disulfide-bond oxidoreductase	-2.69032
SMU_396	WP_002262623.1	aquaporin family protein	-2.72499
SMU_765	WP_002263619.1	alkyl hydroperoxide reductase subunit F	-2.7678
SMU_1437	WP_002263104.1	UDP-N-acetylglucosamine 2-epimerase (non-hydrolyzing)	-2.77862
SMU_530c	WP_002262049.1	DUF975 family protein	-2.85395
SMU_170	WP_002262992.1	30S ribosomal protein S9	-2.85919
SMU_2024c	WP_002262339.1	50S ribosomal protein L4	-2.88809
SMU_1004	WP_002352268.1	glucosyltransferase-I	-2.89218
SMU_t35	.	tRNA-Leu	-2.89538
SMU_540	WP_002262059.1	DNA starvation/stationary phase protection protein	-2.93541
SMU_63c	WP_002263401.1	carbohydrate-binding domain-containing protein	-2.9421
SMU_764	WP_002263620.1	peroxiredoxin	-2.95701
SMU_910	WP_002352262.1	glucosyltransferase-S	-2.95991
SMU_2002	WP_002262316.1	30S ribosomal protein S11	-2.98655
SMU_1117	WP_002262226.1	FAD-dependent oxidoreductase	-3.17855
SMU_602	WP_002263247.1	bile acid:sodium symporter family protein	-3.18533
SMU_145	WP_002263893.1	MFS transporter	-3.29693
SMU_2017	WP_002262330.1	50S ribosomal protein L14	-3.38184
SMU_636	WP_002261905.1	glucosamine-6-phosphate deaminase	-3.58987
SMU_131	WP_002263588.1	lipoate--protein ligase	-3.67917
SMU_t64	.	tRNA-Glu	-3.96341
SMU_2028	WP_002262343.1	levansucrase	-4.30445
SMU_130	WP_002309918.1	dihydrolipoyl dehydrogenase	-4.36754
SMU_127	WP_024781518.1	pyruvate dehydrogenase	-4.64222
SMU_129	WP_002309917.1	dihydrolipoamide acetyltransferase	-4.99848
SMU_128	WP_002263479.1	alpha-ketoacid dehydrogenase subunit beta	-5.07055
SMU_635	WP_002261906.1	VIT family protein	-5.48849
SMU_t39	.	tRNA-Tyr	-5.81535
SMU_t61	.	tRNA-Cys	-6.69963
SMU_1054	WP_002262285.1	gamma-glutamyl-gamma-aminobutyrate hydrolase family protein	-7.46018
SMU_21	WP_002263141.1	rod shape-determining protein MreD	-10.1995
SMU_1411	WP_002263552.1	MFS transporter	-18.9011
SMU_148	WP_002263602.1	bifunctional acetaldehyde-CoA/alcohol dehydrogenase	-26.7595
SMU_1410	WP_002352327.1	FAD-dependent oxidoreductase	-29.8249
